# Supplementary material for: High-resolution genomics identifies pneumococcal diversity and persistence of vaccine types in children with community-acquired pneumonia in the UK and Ireland
Source: BMC Microbiol. 2024 Apr 27;24:146. doi: 10.1186/s12866-024-03300-w (PMC11055344; doi:10.1186/s12866-024-03300-w)
Supplement: Supplementary file 1 — Additional File 1. Table S1 [file 12866_2024_3300_MOESM1_ESM.xlsx]

## Sheet: Sheet1
Table S1. Collection of isolates obtained in this study. In blue, isolates long-read sequenced.
	Identifiers				Patient information						MIC				PBP alleles							Population analysis					Plasmids				ResFinder
Isolates ID	NCBI Biosample	SRA accession	ENA biosample accession	ENA reads accession	Trial arm	Age (months)	PCV status	Region	AB 48h prior	Prior AB	Penicillin MIC		Amoxicillin MIC		PBP1a CDC	mods 1a	PBP2b CDC	mods 2b	PBP2x CDC	mods 2x	CDC	MLST	Serotype	Identity	popPUNK	GPSC	repUS43	rep36	IncI2(Delta)	ColRNAI	erm(B)	tet(M)	msr(D)	mef(A)	aph(3')-III	dfrA12	tet(32)	Tn916
CAPIT001_D1-1	SAMN25118868	SRR21202220	ERS13449307	ERR10183298	Higher + shorter	17.2142	Full-PCV	North West	No		0.01	S	0.01	S	3	5	6	2	5	3	3_6_5	ST53	08	S. pneumoniae	26	3	-	-	-	-	-	-	-	-	-	-	-	-
CAPIT002_D1-1	SAMN25118869	SRR21202219	ERS13449308	ERR10183299	Lower + shorter	45.4665	Full-PCV	North West	No		1	I	1	I	25	99	69	21	56	74	25_69_56	ST10187	Non-typeable/NCC2b	S. pneumoniae	28	81	0.99	-	-	-	1	0.99	-	-	-	-	-	Yes
CAPIT003_D1-1	SAMN25118870	SRR21202305	ERS13449309	ERR10183300	Lower + longer	71.9777	Full-PCV	North West	No		0.06	S	0.01	S	0	4	0	1	148	54	0_0_148	ST452	35B	S. pneumoniae	25	75	-	-	-	-	-	-	-	-	-	-	-	-
CAPIT004_D1-1	SAMN25118871	SRR21202029	ERS13449310	ERR10183301	Higher + shorter	57.1945	Full-PCV	North West	No		0.125	I	0.125	S	23	5	27	16	77	17	23_27_77	ST3774	12F	S. pneumoniae	21	55	-	-	-	-	-	-	-	-	-	-	-	-
CAPIT005_D1-1	SAMN25118872	SRR21202253	ERS13449311	ERR10183302	Higher + longer	37.1222	Full-PCV	North West	No		0.03	S	0.03	S	2	2	0	1	2	0	2_0_2	ST6744	23A	S. pneumoniae	8	7	-	-	-	-	-	-	-	-	-	-	-	-
CAPIT006_D1-1	SAMN25118873	SRR21202242	ERS13449312	ERR10183303	Lower + shorter	19.3824	Full-PCV	North West	Yes	Amoxicillin	0.03	S	0.01	S	2	2	0	1	2	1	2_0_2	ST193	21	S. pneumoniae	4	11	-	0.99	-	-	-	-	-	-	-	-	-	-
CAPIT007_D1-1	SAMN25118874	SRR21202231	ERS13449313	ERR10183304	Higher + longer	36.9251	Full-PCV	North West	No		0.03	S	0.01	S	0	4	0	0	3	15	0_0_3	ST1635	35F	S. pneumoniae	5	36	-	-	-	-	-	-	-	-	-	-	-	-
CAPIT008_D1-1	SAMN25118875	SRR21202023	ERS13449314	ERR10183305	Lower + longer	44.8423	Full-PCV	North West	No		0.25	I	0.06	S	7	50	67	9	1	54	7_67_1	ST2372	23B1	S. pneumoniae	7	5	-	-	-	-	-	-	-	-	-	-	-	-
CAPIT009_D1-1	SAMN25118876	SRR21202012	ERS13449315	ERR10183306	Lower + shorter	30.5848	Full-PCV	North West	No		0.03	S	0.03	S	2	3	6	2	0	2	2_6_0	ST62	11A	S. pneumoniae	1	3	-	-	-	-	-	-	-	-	-	-	-	-
CAPIT010_D1-1	SAMN25118877	SRR21202001	ERS13449316	ERR10183307	Higher + shorter	38.4363	Full-PCV	North West	No		0.125	I	0.125	S	23	5	27	16	77	17	23_27_77	ST3774	12F	S. pneumoniae	21	55	-	0.99	-	-	-	-	-	-	-	-	-	-
CAPIT011_D1-1	SAMN25118878	SRR21202218	ERS13449317	ERR10183308	Higher + shorter	24.2116	Full-PCV	North West	No		0.25	I	0.06	S	7	50	1	40	1	54	7_1_1	ST1349	23B1	S. pneumoniae	7	5	-	-	-	-	-	-	-	-	-	-	-	-
CAPIT012_D1-1	SAMN25118879	SRR21202207	ERS13449318	ERR10183309	Higher + shorter	19.908	Full-PCV	North West	No		0.03	S	0.03	S	0	4	0	2	0	2	0_0_0	ST199	15B/C	S. pneumoniae	6	4	-	-	-	-	-	-	-	-	-	-	-	-
CAPIT013_D1-1	SAMN25118880	SRR21202196	ERS13449319	ERR10183310	Lower + shorter	15.2431	Full-PCV	North West	No		0.03	S	0.01	S	2	2	0	1	2	1	2_0_2	ST193	21	S. pneumoniae	4	11	-	0.99	-	-	-	-	-	-	-	-	-	-
CAPIT014_D1-1	SAMN25118881	SRR21202185	ERS13449320	ERR10183311	Higher + longer	46.3206	Full-PCV	North West	No		0.01	S	0.01	S	2	3	6	2	0	2	2_6_0	ST62	11A	S. pneumoniae	1	3	-	-	-	-	-	-	-	-	-	-	-	-
CAPIT015_D1-1	SAMN25118882	SRR21202142	ERS13449321	ERR10183312	Higher + shorter	16.9842	Full-PCV	North West	No		0.01	S	0.01	S	0	6	0	0	53	2	0_0_53	ST1551	10A	S. pneumoniae	17	35	-	-	-	-	-	-	-	-	-	-	-	-
CAPIT016_D1-1	SAMN25118883	SRR21202131	ERS13449322	ERR10183313	Higher + longer	32.8515	Full-PCV	North West	No		0.03	S	0.01	S	0	4	6	3	2	0	0_6_2	ST30	16F	S. pneumoniae	19	46	-	-	-	-	-	-	-	-	-	-	-	-
CAPIT016_D1-2	SAMN25118884	SRR21201990	ERS13449323	ERR10183314	Higher + longer	32.8515	Full-PCV	North West	No		0.5	I	1	I	25	99	69	21	56	74	25_69_56	ST10187	Non-typeable/NCC2b	S. pneumoniae	28	81	0.99	-	-	-	1	0.99	-	-	-	-	-	Yes
CAPIT017_D1-1	SAMN25118885	SRR21201979	ERS13449324	ERR10183315	Lower + shorter	30.5848	Full-PCV	North West	No		0.01	S	0.01	S	0	4	0	0	3	1	0_0_3	ST1635	35F	S. pneumoniae	5	36	-	-	-	-	-	-	-	-	-	-	-	-
CAPIT018_D1-1	SAMN25118886	SRR21201968	ERS13449325	ERR10183316	Lower + longer	24.6058	Full-PCV	North West	No		0.01	S	0.01	S	1	4	4	2	2	0	1_4_2	ST235	20	S. pneumoniae	61	124	-	-	-	-	-	-	-	-	-	-	-	-
CAPIT018_D1-2	SAMN25118887	SRR21201925	ERS13449326	ERR10183317	Lower + longer	24.6058	Full-PCV	North West	No		0.01	S	0.01	S	1	4	0	0	2	1	1_0_2	ST177	21	S. pneumoniae	10	44	-	-	-	-	-	-	-	-	-	-	-	-
CAPIT019_D1-1	SAMN25118888	SRR21202304	ERS13449327	ERR10183318	Lower + longer	48.5545	Full-PCV	North West	No		0.25	I	0.125	S	7	50	67	9	1	54	7_67_1	ST2372	23B1	S. pneumoniae	7	5	-	-	-	-	-	-	-	-	-	-	-	-
CAPIT020_D1-1	SAMN25118889	SRR21202293	ERS13449328	ERR10183319	Lower + shorter	20.6636	Full-PCV	North West	No		0.01	S	0.01	S	2	3	6	2	0	2	2_6_0	ST62	11A	S. pneumoniae	1	3	-	-	-	-	-	-	-	-	-	-	-	-
CAPIT021_D1-1	SAMN25118890	SRR21202117	ERS13449329	ERR10183320	Lower + shorter	6.34034	Partial-PCV	North West	No		0.125	I	0.125	S	7	50	1	40	1	55	7_1_1	ST1349	23B1	S. pneumoniae	7	5	-	-	-	-	-	-	-	-	-	-	-	-
CAPIT022_D29-1	SAMN25118891	SRR21202106	ERS13449330	ERR10183321	Higher + shorter	20.1051	Full-PCV	North West	Yes	Amoxicillin	0.03	S	0.01	S	1	3	0	0	0	1	1_0_0	ST3811	15A	S. pneumoniae	2	6	-	-	0.98	-	-	-	-	-	-	-	-	-
CAPIT023_D1-1	SAMN25118892	SRR21202095	ERS13449331	ERR10183322	Lower + longer	15.6373	Full-PCV	North West	Yes	Amoxicillin	0.03	S	0.01	S	0	4	0	0	3	1	0_0_3	ST11510	35F	S. pneumoniae	5	36	-	-	-	-	-	-	-	-	-	-	-	-
CAPIT023_D29-1	SAMN25118893	SRR21202084	ERS13449332	ERR10183323	Lower + longer	15.6373	Full-PCV	North West	Yes	Amoxicillin	0.03	S	0.01	S	2	2	0	1	2	1	2_0_2	ST193	21	S. pneumoniae	4	11	-	-	-	-	-	-	-	-	-	-	-	-
CAPIT024_D1-1	SAMN25118894	SRR21202073	ERS13449333	ERR10183324	Higher + longer	39.7175	Full-PCV	North West	Yes	Amoxicillin	0.03	S	0.03	S	2	2	0	1	6	3	2_0_6	ST438	23A	S. pneumoniae	8	7	-	-	-	-	-	-	-	-	-	-	-	-
CAPIT025_D1-1	SAMN25118895	SRR21202062	ERS13449334	ERR10183325	Lower + longer	14.3233	No-PCV	North West	Yes	Amoxicillin	2	I	4	R	15	57	76	39	New	73	15_76_New	ST6521	11A	S. pneumoniae	2	6	-	-	-	-	-	-	-	-	-	-	-	-
CAPIT026_D1-1	SAMN25118896	SRR21202051	ERS13449335	ERR10183326	Higher + longer	27.6938	Full-PCV	West Midlands	No		0.01	S	0.01	S	2	3	6	2	0	2	2_6_0	ST62	11A	S. pneumoniae	1	3	-	-	-	-	-	-	-	-	-	-	-	-
CAPIT026_D29-1	SAMN25118897	SRR21202040	ERS13449336	ERR10183327	Higher + longer	27.6938	Full-PCV	West Midlands	No		0.03	S	0.01	S	78	4	0	0	0	1	78_0_0	ST162	Serogroup 24	S. pneumoniae	2	6	-	-	-	-	-	-	-	-	-	-	-	-
CAPIT027_D1-1	SAMN25118898	SRR21202028	ERS13449337	ERR10183328	Higher + longer	19.0867	Full-PCV	West Midlands	No		0.03	S	0.01	S	78	4	0	0	0	1	78_0_0	ST162	Serogroup 24	S. pneumoniae	2	6	-	-	-	-	-	-	-	-	-	-	-	-
CAPIT028_D1-1	SAMN25118899	SRR21202278	ERS13449338	ERR10183329	Lower + longer	12.0894	Full-PCV	West Midlands	No		0.25	I	0.25	S	7	50	1	40	New	29	7_1_New	ST373	35B	S. pneumoniae	59	91	0.99	-	-	-	1	0.99	-	-	-	-	-	Yes
CAPIT029_D1-1	SAMN25118900	SRR21202267	ERS13449339	ERR10183330	Lower + shorter	26.4126	Full-PCV	West Midlands	No		0.03	S	0.01	S	2	3	6	2	0	2	2_6_0	ST62	11A	S. pneumoniae	1	3	-	-	-	-	-	-	-	-	-	-	-	-
CAPIT030_D1-1	SAMN25118901	SRR21202256	ERS13449340	ERR10183331	Higher + longer	14.4547	Full-PCV	South West	No		0.03	S	0.01	S	0	4	0	0	3	1	0_0_3	ST1635	35F	S. pneumoniae	5	36	-	-	-	-	-	-	-	-	-	-	-	-
CAPIT031_D1-1	SAMN25118902	SRR21201950	ERS13449341	ERR10183332	Lower + shorter	12.2208	Full-PCV	South West	No		0.03	S	0.01	S	11	4	0	1	0	2	11_0_0	ST392	17F	S. pneumoniae	16	49	-	-	-	-	-	-	-	-	-	-	-	-
CAPIT032_D1-1	SAMN25118903	SRR21201939	ERS13449342	ERR10183333	Higher + shorter	20.8936	Full-PCV	South West	No		0.25	I	0.06	S	7	50	1	40	1	54	7_1_1	ST1349	23B1	S. pneumoniae	7	5	-	-	-	-	-	-	-	-	-	-	-	-
CAPIT033_D1-1	SAMN25118904	SRR21201928	ERS13449343	ERR10183334	Lower + longer	59.0342	Full-PCV	South West	No		0.125	I	0.06	S	New	15	New	11	New	60	New_New_New	ST676	35F	S. pneumoniae	58	587	-	-	-	-	-	-	-	-	-	-	-	-
CAPIT034_D1-1	SAMN25118905	SRR21202175	ERS13449344	ERR10183335	Higher + longer	32.8187	Full-PCV	South West	No		0.06	S	0.06	S	0	4	0	0	New	40	0_0_New	ST4346	35B	S. pneumoniae	9	72	-	-	-	-	-	-	-	-	-	-	-	-
CAPIT035_D1-1	SAMN25118906	SRR21202164	ERS13449345	ERR10183336	Lower + shorter	44.7109	Full-PCV	South West	No		0.03	S	0.01	S	1	4	0	2	187	2	1_0_187	ST199	19A	S. pneumoniae	6	4	-	-	-	-	-	-	-	-	-	-	-	-
CAPIT035_D1-2	SAMN25118907	SRR21202153	ERS13449346	ERR10183337	Lower + shorter	44.7109	Full-PCV	South West	No		0.03	S	0.01	S	0	4	0	1	2	0	0_0_2	Unknown ST	35B	S. pneumoniae	9	72	-	-	-	-	-	-	-	-	-	-	-	-
CAPIT035_D29-1	SAMN25118908	SRR21202252	ERS13449347	ERR10183338	Lower + shorter	44.7109	Full-PCV	South West	No		0.03	S	0.01	S	2	2	0	1	2	1	2_0_2	ST193	21	S. pneumoniae	4	11	-	0.99	-	-	-	-	-	-	-	-	-	-
CAPIT036_D1-1	SAMN25118909	SRR21202251	ERS13449348	ERR10183339	Lower + longer	21.5506	Full-PCV	South West	No		0.03	S	0.01	S	2	4	6	2	0	2	2_6_0	ST62	11A	S. pneumoniae	1	3	-	-	-	-	-	-	-	-	-	-	-	-
CAPIT037_D1-1	SAMN25118910	SRR21202250	ERS13449349	ERR10183340	Lower + longer	19.3167	Full-PCV	South West	No		0.03	S	0.01	S	1	3	0	0	0	1	1_0_0	ST3811	15A	S. pneumoniae	2	6	-	-	-	-	-	-	-	-	-	-	-	-
CAPIT038_D1-1	SAMN25118911	SRR21202249	ERS13449350	ERR10183341	Lower + shorter	65.7359	Full-PCV	South West	No		0.03	S	0.03	S	2	3	3	2	2	0	2_3_2	ST180	03	S. pneumoniae	12	12	-	-	-	-	-	-	-	-	-	-	-	-
CAPIT039_D1-1	SAMN25118912	SRR21202248	ERS13449351	ERR10183342	Lower + longer	65.7359	Full-PCV	South West	No		0.03	S	0.01	S	3	5	6	2	5	3	3_6_5	ST53	08	S. pneumoniae	26	3	-	-	-	-	-	-	-	-	-	-	-	-
CAPIT040_D1-1	SAMN25118913	SRR21202247	ERS13449352	ERR10183343	Higher + longer	17.0828	Full-PCV	South West	No		0.03	S	0.01	S	11	4	0	1	0	2	11_0_0	ST392	17F	S. pneumoniae	16	49	-	-	-	-	-	-	-	-	-	-	-	-
CAPIT041_D29-1	SAMN25118914	SRR21202246	ERS13449353	ERR10183344	Lower + shorter	12.6478	Full-PCV	South West	No		0.01	S	0.01	S	2	3	6	2	0	2	2_6_0	ST62	11A	S. pneumoniae	1	3	-	-	-	-	-	-	-	-	-	-	-	-
CAPIT042_D1-1	SAMN25118915	SRR21202245	ERS13449354	ERR10183345	Lower + longer	28.1537	Full-PCV	South West	No		0.03	S	0.01	S	0	4	0	0	3	1	0_0_3	ST1635	35F	S. pneumoniae	5	36	-	-	-	-	-	-	-	-	-	-	-	-
CAPIT043_D1-1	SAMN25118916	SRR21202244	ERS13449355	ERR10183346	Higher + longer	10.6439	Partial-PCV	South West	No		0.03	S	0.01	S	0	4	0	1	2	1	0_0_2	ST8711	15B/C	S. pneumoniae	3	11	-	-	-	-	-	-	-	-	-	-	-	-
CAPIT044_D1-1	SAMN25118917	SRR21202243	ERS13449356	ERR10183347	Lower + longer	40.4731	Full-PCV	South West	No		0.03	S	0.01	S	11	4	0	1	0	2	11_0_0	ST392	17F	S. pneumoniae	16	49	-	-	-	-	-	-	-	-	-	-	-	-
CAPIT045_D1-1	SAMN25118918	SRR21202241	ERS13449357	ERR10183348	Lower + shorter	62.4179	Full-PCV	South West	No		0.03	S	0.03	S	1	4	0	0	0	2	1_0_0	ST66	09N	S. pneumoniae	24	16	-	-	-	-	-	-	-	-	-	-	-	-
CAPIT046_D1-1	SAMN25118919	SRR21202240	ERS13449358	ERR10183349	Lower + longer	77.0039	Full-PCV	South West	No		0.03	S	0.03	S	0	3	0	0	3	1	0_0_3	ST673	33F	S. pneumoniae	57	3	-	-	-	-	-	-	-	-	-	-	-	-
CAPIT047_D1-1	SAMN25118920	SRR21202239	ERS13449359	ERR10183350	Higher + shorter	34.724	Full-PCV	South West	No		0.03	S	0.01	S	2	2	0	1	2	1	2_0_2	ST193	21	S. pneumoniae	4	11	-	-	-	-	-	-	-	-	-	-	-	-
CAPIT048_D1-1	SAMN25118921	SRR21202238	ERS13449360	ERR10183351	Higher + shorter	20.1708	Full-PCV	South West	No		0.03	S	0.03	S	2	3	10	2	2	1	2_10_2	ST6524	10B	S. pneumoniae	56	139	1	-	-	-	-	0.99	-	-	-	-	-	Yes
CAPIT049_D1-1	SAMN25118922	SRR21202237	ERS13449361	ERR10183352	Lower + shorter	26.1498	Full-PCV	South West	No		0.03	S	0.01	S	0	6	0	0	2	1	0_0_2	ST816	10A	S. pneumoniae	15	36	-	-	-	-	-	-	-	-	-	-	-	-
CAPIT050_D1-1	SAMN25118923	SRR21202236	ERS13449362	ERR10183353	Lower + shorter	21.452	Full-PCV	South West	No		0.03	S	0.03	S	0	4	0	2	0	2	0_0_0	ST2220	15B/C	S. pneumoniae	6	4	-	-	-	-	-	-	-	-	-	-	-	-
CAPIT050_D29-1	SAMN25118924	SRR21202235	ERS13449363	ERR10183354	Lower + shorter	21.452	Full-PCV	South West	No		0.125	I	0.06	S	0	3	1	40	1	54	0_1_1	ST1373	23B1	S. pneumoniae	20	5	-	-	-	-	-	-	-	-	-	-	-	-
CAPIT051_D1-1	SAMN25118925	SRR21202234	ERS13449364	ERR10183355	Lower + longer	24.2116	Full-PCV	South West	No		0.03	S	0.01	S	1	4	2	3	2	0	1_2_2	ST433	22F	S. pneumoniae	11	19	-	-	-	-	-	-	-	-	-	-	-	-
CAPIT052_D1-1	SAMN25118926	SRR21202233	ERS13449365	ERR10183356	Higher + longer	23.1603	Full-PCV	South West	No		0.01	S	0.01	S	2	3	6	2	0	2	2_6_0	ST62	11A	S. pneumoniae	1	3	-	-	-	-	-	-	-	-	-	-	-	-
CAPIT053_D1-1	SAMN25118927	SRR21202232	ERS13449366	ERR10183357	Lower + shorter	13.5348	Full-PCV	South West	No		0.125	I	0.03	S	7	50	1	40	1	54	7_1_1	ST1349	23B1	S. pneumoniae	7	5	-	-	-	-	-	-	-	-	-	-	-	-
CAPIT054_D1-1	SAMN25118928	SRR21202230	ERS13449367	ERR10183358	Higher + longer	43.134	Full-PCV	South West	No		0.125	I	0.06	S	0	3	1	40	1	54	0_1_1	ST1373	23B1	S. pneumoniae	20	5	-	-	-	-	-	-	-	-	-	-	-	-
CAPIT055_D1-1	SAMN25118929	SRR21202229	ERS13449368	ERR10183359	Lower + longer	44.0867	Full-PCV	South West	No		0.03	S	0.03	S	0	4	0	1	0	3	0_0_0	ST452	35B	S. pneumoniae	25	75	-	-	-	-	-	-	-	-	-	-	-	-
CAPIT055_D29-1	SAMN25118930	SRR21202228	ERS13449369	ERR10183360	Lower + longer	44.0867	Full-PCV	South West	No		0.25	I	0.06	S	7	50	1	40	1	54	7_1_1	ST1349	23B1	S. pneumoniae	7	5	-	-	-	-	-	-	-	-	-	-	-	-
CAPIT056_D1-1	SAMN25118931	SRR21202227	ERS13449370	ERR10183361	Lower + longer	44.0867	Full-PCV	South West	No		0.03	S	0.03	S	0	4	6	3	2	0	0_6_2	ST30	16F	S. pneumoniae	19	46	-	-	-	-	-	-	-	-	-	-	-	-
CAPIT056_D29-1	SAMN25118932	SRR21202226	ERS13449371	ERR10183362	Lower + longer	44.0867	Full-PCV	South West	No		0.03	S	0.01	S	2	3	6	2	0	2	2_6_0	ST62	11A	S. pneumoniae	1	3	-	-	-	-	-	-	-	-	-	-	-	-
CAPIT057_D1-1	SAMN25118933	SRR21202224	ERS13449372	ERR10183363	Higher + longer	18.6597	Full-PCV	South West	No		0.03	S	0.03	S	2	2	0	1	2	1	2_0_2	ST193	21	S. pneumoniae	4	11	-	-	-	-	-	-	-	-	-	-	-	-
CAPIT058_D1-1	SAMN25118934	SRR21202223	ERS13449373	ERR10183364	Higher + shorter	39.5204	Full-PCV	South West	No		0.03	S	0.01	S	2	2	0	1	0	1	2_0_0	ST3423	19F	S. pneumoniae	33	119	-	-	-	-	-	-	-	-	-	-	-	-
CAPIT059_D29-1	SAMN25118935	SRR21202222	ERS13449374	ERR10183365	Higher + shorter	34.3298	Full-PCV	South West	No		2	I	2	R	4	88	12	20	7	74	4_12_7	ST156	35B	S. pneumoniae	2	6	-	-	-	-	-	-	1	1	-	-	-	No
CAPIT060_D1-1	SAMN25118936	SRR21202221	ERS13449375	ERR10183366	Higher + longer	13.9947	Full-PCV	South West	No		0.03	S	0.03	S	2	3	0	1	2	1	2_0_2	ST1262	15B/C	S. pneumoniae	3	11	-	-	-	-	-	-	-	-	-	-	-	-
CAPIT061_D29-1	SAMN25118937	SRR21202024	ERS13449376	ERR10183367	Higher + shorter	31.5375	Full-PCV	South West	No		0.03	S	0.01	S	2	3	0	1	2	1	2_0_2	ST1262	15B/C	S. pneumoniae	3	11	-	-	-	-	-	-	-	-	-	-	-	-
CAPIT062_D1-1	SAMN25118938	SRR21202022	ERS13449377	ERR10183368	Higher + shorter	14.7175	Full-PCV	South West	No		0.03	S	0.01	S	1	3	0	0	0	1	1_0_0	ST3811	15A	S. pneumoniae	2	6	-	-	-	-	-	-	-	-	-	-	-	-
CAPIT063_D1-1	SAMN25118939	SRR21202021	ERS13449378	ERR10183369	Higher + longer	41.0972	Full-PCV	South West	No		0.01	S	0.01	S	2	3	6	2	0	2	2_6_0	ST62	11A	S. pneumoniae	1	3	-	-	-	-	-	-	-	-	-	-	-	-
CAPIT064_D1-1	SAMN25118940	SRR21202020	ERS13449379	ERR10183370	Lower + longer	15.4074	Full-PCV	South West	No		0.03	S	0.03	S	2	3	0	1	6	3	2_0_6	ST100	33F	S. pneumoniae	18	3	-	-	-	-	-	-	-	-	-	-	-	-
CAPIT064_D29-1	SAMN25118941	SRR21202019	ERS13449380	ERR10183371	Lower + longer	15.4074	Full-PCV	South West	No		0.01	S	0.01	S	0	6	0	0	53	2	0_0_53	ST1551	10A	S. pneumoniae	17	35	-	-	-	-	-	-	-	-	-	-	-	-
CAPIT065_D1-1	SAMN25118942	SRR21202018	ERS13449381	ERR10183372	Lower + shorter	18.4954	Full-PCV	South West	No		0.03	S	0.01	S	2	3	0	1	2	1	2_0_2	ST1262	15B/C	S. pneumoniae	3	11	-	-	-	-	-	-	-	-	-	-	-	-
CAPIT066_USV-1	SAMN25118943	SRR21202017	ERS13449382	ERR10183373	Lower + longer	6.20894	Partial-PCV	South West	No		0.03	S	0.01	S	0	4	0	0	3	1	0_0_3	ST1635	35F	S. pneumoniae	5	36	-	-	-	-	-	-	-	-	-	-	-	-
CAPIT067_D1-1	SAMN25118944	SRR21202016	ERS13449383	ERR10183374	Lower + longer	30.4534	Full-PCV	South West	No		0.06	S	0.03	S	23	5	4	2	77	17	23_4_77	ST8060	12F	S. pneumoniae	21	55	-	0.99	-	-	-	-	-	-	-	-	-	-
CAPIT067_D29-1	SAMN25118945	SRR21202015	ERS13449384	ERR10183375	Lower + longer	30.4534	Full-PCV	South West	No		0.01	S	0.01	S	2	2	0	1	2	1	2_0_2	ST193	21	S. pneumoniae	4	11	-	0.99	-	-	-	-	-	-	-	-	-	-
CAPIT068_D1-1	SAMN25118946	SRR21202014	ERS13449385	ERR10183376	Lower + shorter	27.7267	Full-PCV	South West	No		0.01	S	0.01	S	2	3	0	1	2	1	2_0_2	ST1262	15B/C	S. pneumoniae	3	11	-	-	-	-	-	-	-	-	-	-	-	-
CAPIT069_D1-1	SAMN25118947	SRR21202013	ERS13449386	ERR10183377	Higher + longer	19.1853	Full-PCV	South West	No		0.03	S	0.01	S	1	4	2	3	2	0	1_2_2	ST433	22F	S. pneumoniae	11	19	-	-	-	-	-	-	-	-	-	-	-	-
CAPIT070_D1-1	SAMN25118948	SRR21202011	ERS13449387	ERR10183378	Higher + shorter	37.5164	Full-PCV	South West	No		0.25	I	0.06	S	7	50	1	40	1	54	7_1_1	ST1349	23B1	S. pneumoniae	7	5	-	-	-	-	-	-	-	-	-	-	-	-
CAPIT071_D29-1	SAMN25118949	SRR21202010	ERS13449388	ERR10183379	Higher + shorter	47.2405	Full-PCV	South West	No		0.25	I	0.06	S	7	50	1	40	1	54	7_1_1	ST1349	23B1	S. pneumoniae	7	5	-	-	-	-	-	-	-	-	-	-	-	-
CAPIT072_D29-1	SAMN25118950	SRR21202009	ERS13449389	ERR10183380	Lower + shorter	41.6886	Full-PCV	South West	Yes	Amoxicillin	0.03	S	0.03	S	2	2	0	1	6	3	2_0_6	ST438	23A	S. pneumoniae	8	7	-	-	-	-	-	-	-	-	-	-	-	-
CAPIT073_D29-1	SAMN25118951	SRR21202008	ERS13449390	ERR10183381	Lower + longer	50.2957	Full-PCV	South West	No		0.03	S	0.03	S	2	4	4	2	0	1	2_4_0	ST393	38	S. pneumoniae	23	38	-	-	-	-	-	-	-	-	-	-	-	-
CAPIT074_D1-1	SAMN25118952	SRR21202007	ERS13449391	ERR10183382	Higher + longer	9.55979	Partial-PCV	South West	No		0.03	S	0.01	S	2	2	0	0	0	2	2_0_0	ST766	15B/C	S. pneumoniae	55	131	1	-	-	-	1	-	-	-	-	-	-	No
CAPIT074_D1-2	SAMN25118953	SRR21202006	ERS13449392	ERR10183383	Higher + longer	9.55979	Partial-PCV	South West	No		0.03	S	0.03	S	2	4	4	2	0	1	2_4_0	ST393	38	S. pneumoniae	23	38	-	-	-	-	-	-	-	-	-	-	-	-
CAPIT075_D1-1	SAMN25118954	SRR21202005	ERS13449393	ERR10183384	Higher + longer	40.1445	Full-PCV	South West	No		0.03	S	0.01	S	0	4	0	2	0	2	0_0_0	ST199	15B/C	S. pneumoniae	6	4	-	-	-	-	-	-	-	-	-	-	-	-
CAPIT076_D29-1	SAMN25118955	SRR21202004	ERS13449394	ERR10183385	Lower + longer	23.2589	Full-PCV	South West	No		0.03	S	0.01	S	2	3	6	2	0	2	2_6_0	ST62	11A	S. pneumoniae	1	3	-	-	-	-	-	-	-	-	-	-	-	-
CAPIT077_D1-1	SAMN25118956	SRR21202003	ERS13449395	ERR10183386	Lower + longer	36.2681	Full-PCV	South West	Yes	Amoxicillin	0.03	S	0.01	S	0	4	0	0	2	0	0_0_2	ST198	35B	S. pneumoniae	9	72	-	-	-	-	-	-	-	-	-	-	-	-
CAPIT078_D1-1	SAMN25118957	SRR21202002	ERS13449396	ERR10183387	Higher + shorter	27.661	Full-PCV	South West	Yes	Amoxicillin	0.03	S	0.03	S	2	4	0	0	3	1	2_0_3	ST177	07C	S. pneumoniae	10	44	-	-	-	-	-	-	-	-	-	-	-	-
CAPIT079_D1-1	SAMN25118958	SRR21202000	ERS13449397	ERR10183388	Higher + longer	29.7306	Full-PCV	South West	Yes	Amoxicillin	0.01	S	0.01	S	1	4	2	3	2	0	1_2_2	ST433	22F	S. pneumoniae	11	19	-	-	-	-	-	-	-	-	-	-	-	-
CAPIT079_D1-2	SAMN25118959	SRR21201999	ERS13449398	ERR10183389	Higher + longer	29.7306	Full-PCV	South West	Yes	Amoxicillin	0.01	S	0.03	S	2	3	0	1	2	0	2_0_2	ST180	03	S. pneumoniae	30	12	-	-	-	-	-	-	-	-	-	-	1	No
CAPIT080_D1-1	SAMN25118960	SRR21201998	ERS13449399	ERR10183390	Higher + longer	26.6097	Full-PCV	South West	Yes	Amoxicillin	0.03	S	0.01	S	1	3	0	0	0	1	1_0_0	ST3811	15A	S. pneumoniae	2	6	-	-	-	-	-	-	-	-	-	-	-	-
CAPIT081_D1-1	SAMN25118961	SRR21201997	ERS13449400	ERR10183391	Higher + shorter	19.251	Full-PCV	South West	Yes	Amoxicillin	0.03	S	0.01	S	1	4	2	3	2	0	1_2_2	ST433	22F	S. pneumoniae	11	19	-	-	-	-	-	-	-	-	-	-	-	-
CAPIT082_D1-1	SAMN25118962	SRR21201996	ERS13449401	ERR10183392	Higher + longer	12.615	Full-PCV	Wales	No		0.03	S	0.01	S	0	4	0	1	0	3	0_0_0	ST452	35B	S. pneumoniae	25	75	-	-	-	-	-	-	-	-	-	-	-	-
CAPIT083_D1-1	SAMN25118963	SRR21201995	ERS13449402	ERR10183393	Lower + shorter	20.138	Full-PCV	Wales	No		0.03	S	0.03	S	2	3	0	1	2	1	2_0_2	ST1262	15B/C	S. pneumoniae	3	11	-	-	-	-	-	-	-	-	-	-	-	-
CAPIT084_D1-1	SAMN25118964	SRR21201994	ERS13449403	ERR10183394	Higher + shorter	52.9895	Full-PCV	Wales	No		0.01	S	0.01	S	2	3	6	2	0	2	2_6_0	ST62	11A	S. pneumoniae	1	3	-	-	-	-	-	-	-	-	-	-	-	-
CAPIT085_D29-1	SAMN25118965	SRR21201993	ERS13449404	ERR10183395	Higher + longer	35.1511	Full-PCV	Wales	No		0.03	S	0.03	S	0	3	4	2	2	0	0_4_2	ST398	06C	S. pneumoniae	29	13	-	-	-	-	-	-	-	-	-	-	-	-
CAPIT086_D1-1	SAMN25118966	SRR21201992	ERS13449405	ERR10183396	Lower + shorter	37.0237	Full-PCV	Wales	No		0.01	S	0.01	S	78	4	0	0	0	1	78_0_0	ST162	Serogroup 24	S. pneumoniae	2	6	-	-	-	-	-	-	-	-	-	-	-	-
CAPIT087_USV-1	SAMN25118967	SRR21201991	ERS13449406	ERR10183397	Lower + longer	17.3127	Full-PCV	Wales	No		0.01	S	0.01	S	0	6	0	0	2	1	0_0_2	ST816	10A	S. pneumoniae	15	36	-	-	-	-	-	-	-	-	-	-	-	-
CAPIT088_D1-1	SAMN25118968	SRR21202217	ERS13449407	ERR10183398	Higher + longer	39.6189	Full-PCV	Wales	Yes	Amoxicillin	0.03	S	0.03	S	0	4	0	0	2	0	0_0_2	ST198	35B	S. pneumoniae	9	72	-	-	-	-	-	-	-	-	-	-	-	-
CAPIT089_D29-1	SAMN25118969	SRR21202216	ERS13449408	ERR10183399	Lower + longer	14.159	Full-PCV	Wales	Yes	Amoxicillin	0.03	S	0.01	S	12	4	0	0	0	3	12_0_0	ST1766	31	S. pneumoniae	27	57	-	-	-	-	-	-	-	-	-	-	-	-
CAPIT090_D1-1	SAMN25118970	SRR21202215	ERS13449409	ERR10183400	Lower + shorter	54.3035	Full-PCV	Wales	Yes	Amoxicillin	0.25	I	0.25	S	7	50	1	40	New	42	7_1_New	ST7438	16F	S. pneumoniae	54	386	-	-	-	-	-	-	-	-	-	-	-	-
CAPIT090_D29-1	SAMN25118971	SRR21202214	ERS13449410	ERR10183401	Lower + shorter	54.3035	Full-PCV	Wales	Yes	Amoxicillin	0.03	S	0.03	S	0	3	4	2	2	0	0_4_2	ST398	06C	S. pneumoniae	29	13	-	-	-	-	-	-	-	-	-	-	-	-
CAPIT091_D1-1	SAMN25118972	SRR21202213	ERS13449411	ERR10183402	Higher + longer	16.0644	Full-PCV	Wales	Yes	Amoxicillin	0.01	S	0.01	S	0	4	0	0	2	0	0_0_2	ST198	35B	S. pneumoniae	9	72	-	-	-	-	-	-	-	-	-	-	-	-
CAPIT092_D1-1	SAMN25118973	SRR21202212	ERS13449412	ERR10183403	Lower + shorter	27.9895	Full-PCV	North West	No		0.03	S	0.01	S	1	3	0	0	0	1	1_0_0	ST3811	15A	S. pneumoniae	2	6	-	-	-	-	-	-	-	-	-	-	-	-
CAPIT092_D29-1	SAMN25118974	SRR21202211	ERS13449413	ERR10183404	Lower + shorter	27.9895	Full-PCV	North West	No		0.03	S	0.01	S	2	2	0	1	6	3	2_0_6	ST992	23A	S. pneumoniae	8	7	-	-	-	-	-	-	-	-	-	-	-	-
CAPIT093_D1-1	SAMN25118975	SRR21202210	ERS13449414	ERR10183405	Lower + longer	13.7319	Full-PCV	North West	No		0.25	I	0.125	S	7	50	1	40	171	42	7_1_171	ST1349	23B1	S. pneumoniae	7	5	-	-	-	-	-	-	-	-	-	-	-	-
CAPIT094_D29-1	SAMN25118976	SRR21202209	ERS13449415	ERR10183406	Lower + shorter	32.4901	Full-PCV	North West	Yes	Amoxicillin	0.01	S	0.01	S	2	2	0	1	2	1	2_0_2	ST193	21	S. pneumoniae	4	11	-	0.99	-	-	-	-	-	-	-	-	-	-
CAPIT094_USV-1	SAMN25118977	SRR21202208	ERS13449416	ERR10183407	Lower + shorter	32.4901	Full-PCV	North West	Yes	Amoxicillin	0.03	S	0.01	S	2	3	0	1	2	1	2_0_2	ST1262	15B/C	S. pneumoniae	3	11	-	-	-	-	-	-	-	-	-	-	-	-
CAPIT095_D29-1	SAMN25118978	SRR21202206	ERS13449417	ERR10183408	Higher + longer	21.452	Full-PCV	North West	Yes	Amoxicillin	0.03	S	0.01	S	2	3	0	1	2	1	2_0_2	ST8711	15B/C	S. pneumoniae	3	11	-	-	-	-	-	-	-	-	-	-	-	-
CAPIT096_D1-1	SAMN25118979	SRR21202205	ERS13449418	ERR10183409	Higher + longer	10.9724	Partial-PCV	North West	Yes	Amoxicillin	0.125	I	0.03	S	7	50	1	40	1	54	7_1_1	ST1349	23B1	S. pneumoniae	7	5	-	-	-	-	-	-	-	-	-	-	-	-
CAPIT097_D1-1	SAMN25118980	SRR21202204	ERS13449419	ERR10183410	Lower + longer	41.6229	Full-PCV	North West	Yes	Amoxicillin	0.01	S	0.01	S	2	2	0	1	2	1	2_0_2	ST193	21	S. pneumoniae	4	11	-	0.99	-	-	-	-	-	-	-	-	-	-
CAPIT098_D1-1	SAMN25118981	SRR21202203	ERS13449420	ERR10183411	Higher + shorter	9.85545	Partial-PCV	North West	Yes	Amoxicillin	0.03	S	0.03	S	0	4	0	1	0	3	0_0_0	ST452	35B	S. pneumoniae	25	75	-	-	-	-	-	-	-	-	-	-	-	-
CAPIT098_D29-1	SAMN25118982	SRR21202202	ERS13449421	ERR10183412	Higher + shorter	9.85545	Partial-PCV	North West	Yes	Amoxicillin	0.03	S	0.03	S	2	4	4	2	0	1	2_4_0	ST393	38	S. pneumoniae	23	38	-	-	-	-	-	-	-	-	-	-	-	-
CAPIT099_D1-1	SAMN25118983	SRR21202201	ERS13449422	ERR10183413	Higher + shorter	33.18	Full-PCV	North West	No		0.03	S	0.01	S	0	6	0	0	2	1	0_0_2	ST2068	10A	S. pneumoniae	15	36	-	-	-	-	-	-	-	-	-	-	-	-
CAPIT100_D1-1	SAMN25118984	SRR21202200	ERS13449423	ERR10183414	Higher + longer	12.6807	Full-PCV	London	No		0.03	S	0.01	S	2	3	0	1	3	1	2_0_3	ST8927	34	S. pneumoniae	53	260	-	-	-	-	-	-	-	-	-	-	-	-
CAPIT100_D29-1	SAMN25118985	SRR21202199	ERS13449424	ERR10183415	Higher + longer	12.6807	Full-PCV	London	No		0.03	S	0.01	S	1	4	0	0	0	2	1_0_0	ST66	09N	S. pneumoniae	24	16	-	-	-	-	-	-	-	-	-	-	-	-
CAPIT101_D1-1	SAMN25118986	SRR21202198	ERS13449425	ERR10183416	Lower + longer	70.9921	Full-PCV	London	No		0.03	S	0.01	S	1	4	0	0	0	2	1_0_0	ST66	09N	S. pneumoniae	24	16	-	-	-	-	-	-	-	-	-	-	-	-
CAPIT102_D1-1	SAMN25118987	SRR21202197	ERS13449426	ERR10183417	Higher + shorter	30.3876	Full-PCV	London	No		0.01	S	0.01	S	2	2	0	1	6	3	2_0_6	ST438	23A	S. pneumoniae	8	7	-	-	-	-	-	-	-	-	-	-	-	-
CAPIT103_D1-1	SAMN25118988	SRR21202195	ERS13449427	ERR10183418	Lower + shorter	29.4021	Full-PCV	London	No		0.03	S	0.01	S	0	6	0	0	53	2	0_0_53	ST1551	10A	S. pneumoniae		35	-	-	-	-	-	-	-	-	-	-	-	-
CAPIT104_D1-1	SAMN25118989	SRR21202194	ERS13449428	ERR10183419	Lower + longer	37.9435	Full-PCV	London	No		0.06	S	0.01	S	23	6	4	2	139	26	23_4_139	ST9972	19F	S. pneumoniae	10	44	0.99	-	-	-	100%,99%	-	-	-	1	-	-	Yes
CAPIT105_D1-1	SAMN25118990	SRR21202193	ERS13449429	ERR10183420	Higher + longer	36.5309	Full-PCV	London	No		0.01	S	0.01	S	0	6	0	0	2	1	0_0_2	ST2068	10A	S. pneumoniae	15	36	-	-	-	-	-	-	-	-	-	-	-	-
CAPIT106_D1-1	SAMN25118991	SRR21202192	ERS13449430	ERR10183421	Lower + longer	51.4126	NA	London	No		0.03	S	0.03	S	2	3	3	2	2	0	2_3_2	ST180	03	S. pneumoniae	12	12	-	-	-	-	-	-	-	-	-	-	-	-
CAPIT107_D1-1	SAMN25118992	SRR21202191	ERS13449431	ERR10183422	Higher + shorter	19.251	Full-PCV	London	No		0.03	S	0.01	S	2	3	6	2	0	2	2_6_0	ST62	11A	S. pneumoniae	1	3	-	-	-	-	-	-	-	-	-	-	-	-
CAPIT108_D1-1	SAMN25118993	SRR21202190	ERS13449432	ERR10183423	Lower + longer	14.7175	Full-PCV	London	No		0.01	S	0.01	S	2	3	6	2	0	2	2_6_0	ST62	11A	S. pneumoniae	1	3	-	-	-	-	-	-	-	-	-	-	-	-
CAPIT108_D29-1	SAMN25118994	SRR21202189	ERS13449433	ERR10183424	Lower + longer	14.7175	Full-PCV	London	No		0.01	S	0.01	S	12	4	0	0	0	3	12_0_0	ST1766	31	S. pneumoniae	27	57	-	-	-	-	-	-	-	-	-	-	-	-
CAPIT109_D1-1	SAMN25118995	SRR21202188	ERS13449434	ERR10183425	Lower + shorter	15.276	Full-PCV	London	No		0.01	S	0.01	S	2	3	6	2	0	2	2_6_0	ST62	11A	S. pneumoniae	1	3	-	-	-	-	-	-	-	-	-	-	-	-
CAPIT110_D1-1	SAMN25118996	SRR21202187	ERS13449435	ERR10183426	Lower + longer	30.2562	Full-PCV	London	No		2	I	2	R	New	108	New	30	7	75	New_New_7	ST8356	Non-typeable/NCC2a	S. pneumoniae	14	60	1	-	-	-	1	0.99	-	-	-	-	-	Yes
CAPIT111_D1-1	SAMN25118997	SRR21202186	ERS13449436	ERR10183427	Higher + shorter	51.6426	Full-PCV	London	No		0.25	I	0.06	S	7	50	1	40	1	54	7_1_1	ST1349	23B1	S. pneumoniae	7	5	-	-	-	-	-	-	-	-	-	-	-	-
CAPIT112_D29-1	SAMN25118998	SRR21202152	ERS13449437	ERR10183428	Lower + shorter	28.7122	Full-PCV	London	No		0.25	I	0.125	S	24	39	27	16	77	17	24_27_77	ST14400	15A	S. pneumoniae	13	9	0.99	-	-	-	1	0.99	-	-	-	-	-	No
CAPIT113_D29-1	SAMN25118999	SRR21202151	ERS13449438	ERR10183429	Lower + shorter	61.5637	Full-PCV	London	No		0.125	I	0.25	S	86	56	16	24	126	55	86_16_126	ST14236	Non-typeable/NCC2a	S. pneumoniae	14	60	0.99	-	-	-	-	0.99	1	1	-	-	-	Yes
CAPIT114_D29-1	SAMN25119000	SRR21202150	ERS13449439	ERR10183430	Higher + longer	48.8502	Full-PCV	North East	Yes	Amoxicillin	0.01	S	0.01	S	2	3	0	1	2	0	2_0_2	ST180	03	S. pneumoniae	30	12	-	-	-	-	-	-	-	-	-	-	-	-
CAPIT115_D1-1	SAMN25119001	SRR21202149	ERS13449440	ERR10183431	Lower + shorter	25.8541	Full-PCV	North East	Yes	Amoxicillin	0.01	S	0.01	S	1	3	0	0	0	1	1_0_0	ST3811	15A	S. pneumoniae	2	6	-	-	-	-	-	-	-	-	-	-	-	-
CAPIT115_D29-1	SAMN25119002	SRR21202148	ERS13449441	ERR10183432	Lower + shorter	25.8541	Full-PCV	North East	Yes	Amoxicillin	0.03	S	0.01	S	2	2	0	1	0	2	2_0_0	ST8606	17F	S. pneumoniae	16	49	-	-	-	-	-	-	-	-	-	-	-	-
CAPIT116_D1-1	SAMN25119003	SRR21202147	ERS13449442	ERR10183433	Lower + longer	53.6465	Full-PCV	London	No		0.25	I	0.03	S	24	39	27	16	28	27	24_27_28	ST9355	15A	S. pneumoniae	13	9	0.99	-	-	-	1	0.99	-	-	-	-	-	No
CAPIT116_D29-1	SAMN25119004	SRR21202146	ERS13449443	ERR10183434	Lower + longer	53.6465	Full-PCV	London	No		0.01	S	0.01	S	0	4	0	0	2	0	0_0_2	ST547	34	S. pneumoniae	52	45	-	-	-	-	-	-	-	-	-	-	-	-
CAPIT117_D1-1	SAMN25119005	SRR21202145	ERS13449444	ERR10183435	Lower + shorter	28.3509	Full-PCV	London	No		0.01	S	0.01	S	2	3	6	2	0	2	2_6_0	ST62	11A	S. pneumoniae	1	3	-	-	-	-	-	-	-	-	-	-	-	-
CAPIT117_D29-1	SAMN25119006	SRR21202144	ERS13449445	ERR10183436	Lower + shorter	28.3509	Full-PCV	London	No		0.01	S	0.01	S	2	3	0	0	6	3	2_0_6	ST717	33F	S. pneumoniae	18	3	1	-	-	-	1	0.99	-	-	-	-	-	Yes
CAPIT118_D1-1	SAMN25119007	SRR21202143	ERS13449446	ERR10183437	Higher + longer	30.7819	Full-PCV	London	No		0.03	S	0.01	S	0	4	0	0	2	0	0_0_2	ST198	35B	S. pneumoniae	9	72	-	-	-	-	-	-	-	-	-	-	-	-
CAPIT119_D1-1	SAMN25119008	SRR21202141	ERS13449447	ERR10183438	Higher + shorter	53.088	Full-PCV	London	No		0.01	S	0.01	S	2	3	3	2	2	0	2_3_2	ST180	03	S. pneumoniae	12	12	-	-	-	-	-	-	-	-	-	-	-	-
CAPIT119_D1-2	SAMN25119009	SRR21202140	ERS13449448	ERR10183439	Higher + shorter	53.088	Full-PCV	London	No		0.03	S	0.03	S	0	4	0	0	3	1	0_0_3	ST1635	35F	S. pneumoniae	5	36	-	-	-	-	-	-	-	-	-	-	-	-
CAPIT120_D1-1	SAMN25119010	SRR21202139	ERS13449449	ERR10183440	Lower + longer	13.5677	Full-PCV	London	No		0.03	S	0.03	S	0	4	0	1	0	3	0_0_0	ST5139	15A	S. pneumoniae	51	11	-	-	-	-	-	-	-	-	-	-	-	-
CAPIT121_D29-1	SAMN25119011	SRR21202138	ERS13449450	ERR10183441	Higher + shorter	33.8042	Full-PCV	London	No		0.01	S	0.01	S	2	3	6	2	0	2	2_6_0	ST62	11A	S. pneumoniae	1	3	-	-	-	-	-	-	-	-	-	-	-	-
CAPIT122_D1-1	SAMN25119012	SRR21202137	ERS13449451	ERR10183442	Lower + shorter	34.9869	Full-PCV	London	No		0.03	S	0.01	S	2	2	4	2	3	1	2_4_3	ST473	10A	S. pneumoniae	50	NA	0.99	-	-	-	-	0.99	-	-	-	-	-	Yes
CAPIT123_D1-1	SAMN25119013	SRR21202136	ERS13449452	ERR10183443	Higher + longer	15.046	Full-PCV	London	No		0.03	S	0.01	S	0	4	0	0	3	2	0_0_3	ST1635	35F	S. pneumoniae	5	36	-	-	-	-	-	-	-	-	-	-	-	-
CAPIT124_D1-1	SAMN25119014	SRR21202135	ERS13449453	ERR10183444	Higher + longer	29.7635	Full-PCV	London	No		0.03	S	0.01	S	0	4	0	0	2	0	0_0_2	ST198	35B	S. pneumoniae	9	72	-	-	-	-	-	-	-	-	-	-	-	-
CAPIT125_D1-1	SAMN25119015	SRR21202134	ERS13449454	ERR10183445	Higher + longer	54.0079	Full-PCV	London	No		0.01	S	0.01	S	2	3	0	0	2	0	2_0_2	ST180	03	S. pneumoniae	30	12	0.99	-	-	-	-	0.99	-	-	-	-	-	Yes
CAPIT126_D1-1	SAMN25119016	SRR21202133	ERS13449455	ERR10183446	Higher + shorter	30.1248	Full-PCV	London	No		0.03	S	0.03	S	2	3	3	2	2	0	2_3_2	ST180	03	S. pneumoniae	12	12	-	-	-	-	-	-	-	-	-	-	-	-
CAPIT126_D1-2	SAMN25119017	SRR21202132	ERS13449456	ERR10183447	Higher + shorter	30.1248	Full-PCV	London	No		0.03	S	0.03	S	2	3	0	1	2	1	2_0_2	ST1262	15B/C	S. pneumoniae	3	11	-	0.99	-	-	-	-	-	-	-	-	-	-
CAPIT127_D29-1	SAMN25119018	SRR21202130	ERS13449457	ERR10183448	Lower + shorter	7.22733	Partial-PCV	London	No		0.03	S	0.01	S	0	4	0	2	0	2	0_0_0	ST667	19A	S. pneumoniae	6	4	-	-	-	-	-	-	-	-	-	-	-	-
CAPIT128_D1-1	SAMN25119019	SRR21202129	ERS13449458	ERR10183449	Lower + longer	23.5874	Full-PCV	London	No		0.01	S	0.01	S	0	3	0	1	2	1	0_0_2	ST432	21	S. pneumoniae	49	99	-	-	-	-	-	-	-	-	-	-	-	-
CAPIT129_D1-1	SAMN25119020	SRR21202128	ERS13449459	ERR10183450	Lower + shorter	42.0171	No-PCV	London	No		0.01	S	0.01	S	2	3	0	1	2	1	2_0_2	ST1262	15B/C	S. pneumoniae	3	11	-	-	-	-	-	-	-	-	-	-	-	-
CAPIT130_D29-1	SAMN25119021	SRR21202127	ERS13449460	ERR10183451	Lower + longer	14.159	Full-PCV	London	No		0.01	S	0.01	S	11	4	4	1	0	3	11_4_0	ST447	37	S. pneumoniae	48	123	-	-	-	-	-	-	-	-	-	-	-	-
CAPIT131_D1-1	SAMN25119022	SRR21202126	ERS13449461	ERR10183452	Lower + shorter	60.9724	Full-PCV	London	No		0.01	S	0.01	S	86	56	82	4	162	4	86_82_162	ST448	Non-typeable/NCC2a	S. pneumoniae	14	60	-	-	-	-	-	-	-	-	-	-	-	-
CAPIT132_D1-1	SAMN25119023	SRR21202125	ERS13449462	ERR10183453	Higher + shorter	57.4901	Full-PCV	London	No		0.25	I	0.06	S	7	50	1	40	1	54	7_1_1	ST1349	23B1	S. pneumoniae	7	5	-	-	-	-	-	-	-	-	-	-	-	-
CAPIT133_D1-1	SAMN25119024	SRR21202124	ERS13449463	ERR10183454	Higher + shorter	16.9514	Full-PCV	London	No		0.125	I	0.06	S	0	3	1	40	1	54	0_1_1	ST1373	23B1	S. pneumoniae	20	5	-	-	-	-	-	-	-	-	-	-	-	-
CAPIT134_D29-1	SAMN25119025	SRR21202123	ERS13449464	ERR10183455	Lower + shorter	27.6938	Full-PCV	London	No		0.03	S	0.01	S	0	4	New	1	3	1	0_New_3	ST446	35F	S. pneumoniae	5	36	-	-	-	-	-	-	-	-	-	-	-	-
CAPIT135_D1-1	SAMN25119026	SRR21202122	ERS13449465	ERR10183456	Higher + longer	54.0736	Full-PCV	London	Yes	Amoxicillin	0.01	S	0.01	S	1	3	0	0	0	1	1_0_0	ST3811	15A	S. pneumoniae	2	6	-	-	-	-	-	-	-	-	-	-	-	-
CAPIT136_D1-1	SAMN25119027	SRR21202121	ERS13449466	ERR10183457	Lower + shorter	70.795	Full-PCV	London	No		0.01	S	0.01	S	2	3	3	2	2	0	2_3_2	ST180	03	S. pneumoniae	12	12	-	-	-	-	-	-	-	-	-	-	-	-
CAPIT137_D1-1	SAMN25119028	SRR21201989	ERS13449467	ERR10183458	Lower + shorter	61.1367	No-PCV	London	No		0.125	I	0.03	S	7	50	67	9	1	54	7_67_1	ST2372	23B1	S. pneumoniae	7	5	-	-	-	-	-	-	-	-	-	-	-	-
CAPIT138_D1-1	SAMN25119029	SRR21201988	ERS13449468	ERR10183459	Higher + longer	38.8962	Full-PCV	London	No		0.01	S	0.01	S	0	3	0	0	3	1	0_0_3	ST58	15A	S. pneumoniae	32	140	-	-	-	-	-	-	-	-	-	-	-	-
CAPIT139_D1-1	SAMN25119030	SRR21201987	ERS13449469	ERR10183460	Lower + longer	21.4849	Full-PCV	London	Yes	Co-amoxiclav	0.125	I	0.125	S	23	5	27	16	77	17	23_27_77	ST3774	12F	S. pneumoniae	21	55	-	0.99	-	-	-	-	-	-	-	-	-	-
CAPIT140_D1-1	SAMN25119031	SRR21201986	ERS13449470	ERR10183461	Higher + longer	16.9514	Full-PCV	London	Yes	Amoxicillin	0.03	S	0.01	S	0	6	0	0	53	2	0_0_53	ST1551	10A	S. pneumoniae	17	35	-	-	-	-	-	-	-	-	-	-	-	-
CAPIT141_USV-1	SAMN25119032	SRR21201985	ERS13449471	ERR10183462	Higher + shorter	16.0315	Full-PCV	London	Yes	Amoxicillin	0.25	I	0.03	S	24	39	27	16	28	27	24_27_28	ST9355	15A	S. pneumoniae	13	9	0.99	-	-	-	1	0.99	-	-	-	-	-	No
CAPIT142_D29-1	SAMN25119033	SRR21201984	ERS13449472	ERR10183463	Higher + shorter	33.18	Full-PCV	London	Yes	Amoxicillin	0.03	S	0.01	S	2	2	New	2	2	1	2_New_2	ST193	21	S. pneumoniae	4	11	-	-	-	-	-	-	-	-	-	-	-	-
CAPIT143_D29-1	SAMN25119034	SRR21201983	ERS13449473	ERR10183464	Higher + longer	51.6426	Full-PCV	London	Yes	Amoxicillin	0.03	S	0.01	S	78	4	0	0	0	1	78_0_0	ST162	Serogroup 24	S. pneumoniae	2	6	-	-	-	-	-	-	-	-	-	-	-	-
CAPIT144_D1-1	SAMN25119035	SRR21201982	ERS13449474	ERR10183465	Lower + shorter	16.59	Full-PCV	London	Yes	Amoxicillin	0.125	I	0.125	S	2	3	53	18	77	18	2_53_77	ST386	06C	S. pneumoniae	47	47	0.99	-	-	-	1	0.99	-	-	-	-	-	Yes
CAPIT145_D29-1	SAMN25119036	SRR21201981	ERS13449475	ERR10183466	Higher + shorter	38.6005	Full-PCV	London	Yes	Amoxicillin	0.03	S	0.01	S	2	4	0	0	3	1	2_0_3	ST177	07C	S. pneumoniae	10	44	-	-	-	-	-	-	-	-	-	-	-	-
CAPIT146_D1-1	SAMN25119037	SRR21201980	ERS13449476	ERR10183467	Lower + longer	18.1997	Full-PCV	London	Yes	Amoxicillin	0.01	S	0.01	S	2	3	0	1	2	1	2_0_2	ST1262	15B/C	S. pneumoniae	3	11	-	0.99	-	-	-	-	-	-	-	-	-	-
CAPIT147_D29-1	SAMN25119038	SRR21201978	ERS13449477	ERR10183468	Lower + longer	17.1156	Full-PCV	London	Yes	Amoxicillin	0.06	S	0.06	S	0	4	0	0	New	40	0_0_New	ST4346	35B	S. pneumoniae	9	72	-	-	-	-	-	-	-	-	-	-	-	-
CAPIT148_D1-1	SAMN25119039	SRR21201977	ERS13449478	ERR10183469	Lower + shorter	46.8463	Full-PCV	London	Yes	Amoxicillin	0.03	S	0.01	S	0	4	0	2	0	2	0_0_0	ST199	15B/C	S. pneumoniae	6	4	-	-	-	-	-	-	-	-	-	-	-	-
CAPIT149_D1-1	SAMN25119040	SRR21201976	ERS13449479	ERR10183470	Lower + longer	15.4402	Full-PCV	London	Yes	Amoxicillin	0.03	S	0.01	S	0	4	0	0	3	1	0_0_3	ST1635	35F	S. pneumoniae	5	36	-	-	-	-	-	-	-	-	-	-	-	-
CAPIT150_D29-1	SAMN25119041	SRR21201975	ERS13449480	ERR10183471	Lower + shorter	15.1445	Full-PCV	London	Yes	Amoxicillin	0.03	S	0.01	S	0	4	0	2	0	2	0_0_0	ST2220	15B/C	S. pneumoniae	6	4	-	-	-	-	-	-	-	-	-	-	-	-
CAPIT151_D1-1	SAMN25119042	SRR21201974	ERS13449481	ERR10183472	Higher + shorter	22.569	No-PCV	London	Yes	Amoxicillin	0.03	S	0.01	S	2	3	0	1	2	1	2_0_2	ST8711	15B/C	S. pneumoniae	3	11	-	-	-	-	-	-	-	-	-	-	-	-
CAPIT152_D1-1	SAMN25119043	SRR21201973	ERS13449482	ERR10183473	Higher + longer	19.8752	Full-PCV	London	Yes	Amoxicillin	2	I	8	R	15	57	76	39	New	73	15_76_New	ST6521	11A	S. pneumoniae	2	6	-	-	-	-	-	-	-	-	-	-	-	-
CAPIT153_D1-1	SAMN25119044	SRR21201972	ERS13449483	ERR10183474	Lower + shorter	29.5335	Full-PCV	London	Yes	Amoxicillin	0.01	S	0.01	S	12	4	0	0	0	3	12_0_0	ST1766	31	S. pneumoniae	27	57	-	-	-	-	-	-	-	-	-	-	-	-
CAPIT154_D1-1	SAMN25119045	SRR21201971	ERS13449484	ERR10183475	Lower + longer	17.0828	Full-PCV	London	Yes	Amoxicillin	0.03	S	0.01	S	2	2	0	1	6	3	2_0_6	ST992	23A	S. pneumoniae	8	7	-	-	-	-	-	-	-	-	-	-	-	-
CAPIT155_D29-1	SAMN25119046	SRR21201970	ERS13449485	ERR10183476	Higher + longer	31.3403	Full-PCV	London	No		1	I	1	I	25	101	7	30	56	74	25_7_56	ST8991	Non-typeable/NCC2b	S. pneumoniae	28	81	0.96	-	-	-	1	0.99	-	-	1	-	-	Yes
CAPIT156_D1-1	SAMN25119047	SRR21201969	ERS13449486	ERR10183477	Lower + longer	25.2628	Full-PCV	London	No		0.03	S	0.01	S	2	3	0	1	2	1	2_0_2	ST1262	15B/C	S. pneumoniae	3	11	-	-	-	-	-	-	-	-	-	-	-	-
CAPIT157_D1-1	SAMN25119048	SRR21201967	ERS13449487	ERR10183478	Lower + longer	28.4166	Full-PCV	London	No		0.03	S	0.03	S	2	2	0	1	2	1	2_0_2	ST193	21	S. pneumoniae	4	11	-	-	-	-	-	-	-	-	-	-	-	-
CAPIT158_D1-1	SAMN25119049	SRR21201966	ERS13449488	ERR10183479	Higher + longer	12.3522	Full-PCV	London	Yes	Amoxicillin	0.25	I	0.03	S	24	39	27	16	28	27	24_27_28	ST9355	15A	S. pneumoniae	13	9	0.99	-	-	-	1	0.99	-	-	-	-	-	No
CAPIT159_D1-1	SAMN25119050	SRR21201965	ERS13449489	ERR10183480	Lower + shorter	49.9014	Full-PCV	London	No		0.03	S	0.03	S	1	4	0	0	0	2	1_0_0	ST66	09N	S. pneumoniae	24	16	-	-	-	-	-	-	-	-	-	-	-	-
CAPIT160_D1-1	SAMN25119051	SRR21201964	ERS13449490	ERR10183481	Higher + shorter	11.8265	Partial-PCV	London	No		0.03	S	0.03	S	0	4	0	2	0	2	0_0_0	ST2220	15B/C	S. pneumoniae	6	4	-	-	-	-	-	-	-	-	-	-	-	-
CAPIT161_D1-1	SAMN25119052	SRR21201963	ERS13449491	ERR10183482	Lower + longer	22.7989	Full-PCV	London	No		0.125	I	0.125	S	24	39	27	16	New	52	24_27_New	ST11218	15A	S. pneumoniae	13	9	0.99	-	-	-	1	0.99	-	-	-	-	-	No
CAPIT161_D1-2	SAMN25119053	SRR21201962	ERS13449492	ERR10183483	Lower + longer	22.7989	Full-PCV	London	No		0.03	S	0.01	S	12	4	0	0	0	3	12_0_0	ST1766	31	S. pneumoniae	27	57	-	-	-	-	-	-	-	-	-	-	-	-
CAPIT162_D1-1	SAMN25119054	SRR21201961	ERS13449493	ERR10183484	Higher + shorter	56.9317	Full-PCV	London	Yes	Amoxicillin	0.25	I	0.25	S	67	36	27	16	35	24	67_27_35	ST63	15A	S. pneumoniae	13	9	0.99	-	-	-	0.99	0.99	-	-	-	-	-	No
CAPIT163_D1-1	SAMN25119055	SRR21201960	ERS13449494	ERR10183485	Lower + longer	15.3088	Full-PCV	London	Yes	Amoxicillin	0.03	S	0.01	S	2	3	6	2	0	2	2_6_0	ST62	11A	S. pneumoniae	1	3	-	-	-	-	-	-	-	-	-	-	-	-
CAPIT164_D1-1	SAMN25119056	SRR21201959	ERS13449495	ERR10183486	Higher + shorter	21.1564	Full-PCV	London	Yes	Amoxicillin	0.03	S	0.01	S	2	3	6	2	0	2	2_6_0	ST62	11A	S. pneumoniae	1	3	-	-	-	-	-	-	-	-	-	-	-	-
CAPIT165_D1-1	SAMN25119057	SRR21201926	ERS13449496	ERR10183487	Lower + shorter	24.77	Full-PCV	Scotland	No		0.25	I	0.125	S	New	25	New	11	New	29	New_New_New	Unknown ST	15F	S. pneumoniae	46	84	0.99	-	-	-	1	0.99	-	-	-	-	-	Yes
CAPIT165_D29-1	SAMN25119058	SRR21201924	ERS13449497	ERR10183488	Lower + shorter	24.77	Full-PCV	Scotland	No		0.03	S	0.03	S	2	2	0	1	6	3	2_0_6	ST438	23A	S. pneumoniae	8	7	-	-	-	-	-	-	-	-	-	-	-	-
CAPIT166_D1-1	SAMN25119059	SRR21202225	ERS13449498	ERR10183489	Higher + longer	24.2116	Full-PCV	Scotland	No		0.03	S	0.03	S	2	2	0	1	6	3	2_0_6	ST438	23A	S. pneumoniae	8	7	-	-	-	-	-	-	-	-	-	-	-	-
CAPIT167_D1-1	SAMN25119060	SRR21202313	ERS13449499	ERR10183490	Lower + longer	27.4967	Full-PCV	Scotland	No		0.03	S	0.01	S	0	4	0	0	3	1	0_0_3	ST1635	35F	S. pneumoniae	5	36	-	-	-	-	-	-	-	-	-	-	-	-
CAPIT167_D29-1	SAMN25119061	SRR21202312	ERS13449500	ERR10183491	Lower + longer	27.4967	Full-PCV	Scotland	No		0.03	S	0.01	S	0	6	0	0	2	1	0_0_2	ST2068	10A	S. pneumoniae	15	36	-	-	-	-	-	-	-	-	-	-	-	-
CAPIT168_D1-1	SAMN25119062	SRR21202311	ERS13449501	ERR10183492	Lower + longer	20.6307	Full-PCV	Scotland	No		0.03	S	0.03	S	2	2	0	1	2	1	2_0_2	ST3689	21	S. pneumoniae	4	11	-	0.99	-	-	-	-	-	-	-	-	-	-
CAPIT169_D1-1	SAMN25119063	SRR21202310	ERS13449502	ERR10183493	Higher + shorter	40.7359	Full-PCV	Scotland	No		0.03	S	0.03	S	12	4	0	0	0	2	12_0_0	ST8289	31	S. pneumoniae	45	57	-	-	-	-	-	-	-	-	-	-	-	-
CAPIT170_D1-1	SAMN25119064	SRR21202309	ERS13449503	ERR10183494	Lower + shorter	18.8239	Full-PCV	Scotland	Yes	Amoxicillin	0.01	S	0.01	S	2	2	0	1	2	1	2_0_2	ST1877	21	S. pneumoniae	4	11	-	0.99	-	-	-	-	-	-	-	-	-	-
CAPIT171_D1-1	SAMN25119065	SRR21202308	ERS13449504	ERR10183495	Higher + longer	16.2286	Full-PCV	North East	No		0.03	S	0.03	S	0	4	6	3	2	0	0_6_2	ST30	16F	S. pneumoniae	19	46	-	-	-	-	-	-	-	-	-	-	-	-
CAPIT172_D1-1	SAMN25119066	SRR21202307	ERS13449505	ERR10183496	Lower + shorter	24.8029	Full-PCV	South East	No		0.03	S	0.03	S	0	4	0	1	2	0	0_0_2	ST2690	35B	S. pneumoniae	44	72	-	-	-	-	-	-	-	-	-	-	-	-
CAPIT173_D1-1	SAMN25119067	SRR21202306	ERS13449506	ERR10183497	Higher + shorter	61.6951	Full-PCV	South East	No		0.125	I	0.125	S	55	58	60	7	43	75	55_60_43	ST4145	Non-typeable/NCC2a	S. pneumoniae	28	81	0.98	-	-	-	1	0.99	-	-	1	-	-	Yes
CAPIT174_D1-1	SAMN25119068	SRR21202303	ERS13449507	ERR10183498	Lower + longer	21.9777	Full-PCV	South East	Yes	Amoxicillin	0.03	S	0.03	S	1	3	0	0	0	1	1_0_0	ST3811	15A	S. pneumoniae	2	6	-	-	-	-	-	-	-	-	-	-	-	-
CAPIT174_D1-2	SAMN25119069	SRR21202302	ERS13449508	ERR10183499	Lower + longer	21.9777	Full-PCV	South East	Yes	Amoxicillin	0.03	S	0.03	S	3	5	6	2	5	3	3_6_5	ST53	08	S. pneumoniae	26	3	-	-	-	-	-	-	-	-	-	-	-	-
CAPIT175_D1-1	SAMN25119070	SRR21202301	ERS13449509	ERR10183500	Lower + shorter	12.1551	Full-PCV	London	No		0.03	S	0.01	S	0	4	0	0	3	1	0_0_3	ST1635	35F	S. pneumoniae	5	36	-	-	-	-	-	-	-	-	-	-	-	-
CAPIT176_D29-1	SAMN25119071	SRR21202300	ERS13449510	ERR10183501	Higher + shorter	37.615	Full-PCV	London	No		0.03	S	0.01	S	2	2	0	1	2	1	2_0_2	ST193	21	S. pneumoniae	4	11	-	-	-	-	-	-	-	-	-	-	-	-
CAPIT176_D1-1	SAMN25119072	SRR21202299	ERS13449511	ERR10183502	Higher + shorter	#N/A	Full-PCV	London	No		0.03	S	0.01	S	0	4	0	2	0	2	0_0_0	ST199	15B/C	S. pneumoniae	6	4	-	-	-	-	-	-	-	-	-	-	-	-
CAPIT177_D1-1	SAMN25119073	SRR21202298	ERS13449512	ERR10183503	Higher + shorter	12.8449	Full-PCV	London	No		0.01	S	0.01	S	2	3	6	2	0	2	2_6_0	ST62	11A	S. pneumoniae	1	3	-	-	-	-	-	-	-	-	-	-	-	-
CAPIT178_D1-1	SAMN25119074	SRR21202297	ERS13449513	ERR10183504	Lower + longer	40.4731	Full-PCV	London	No		0.03	S	0.01	S	2	3	0	1	2	1	2_0_2	ST1262	15B/C	S. pneumoniae	3	11	-	-	-	-	-	-	-	-	-	-	-	-
CAPIT179_D1-1	SAMN25119075	SRR21202296	ERS13449514	ERR10183505	Higher + longer	32.8515	Full-PCV	London	No		0.01	S	0.01	S	2	3	0	1	2	1	2_0_2	ST1262	15B/C	S. pneumoniae	3	11	-	0.99	-	-	-	-	-	-	-	-	-	-
CAPIT180_D1-1	SAMN25119076	SRR21202295	ERS13449515	ERR10183506	Lower + shorter	39.2247	Full-PCV	London	No		0.01	S	0.01	S	0	4	0	0	3	1	0_0_3	ST446	35F	S. pneumoniae	5	36	-	-	-	-	-	-	-	-	-	-	-	-
CAPIT181_D1-1	SAMN25119077	SRR21202294	ERS13449516	ERR10183507	Lower + longer	52.201	Full-PCV	London	No		2	I	2	R	13	76	New	18	43	78	13_New_43	ST63	15A	S. pneumoniae	13	9	0.99	-	-	-	1	0.99	-	-	-	-	-	No
CAPIT182_D29-1	SAMN25119078	SRR21202292	ERS13449517	ERR10183508	Lower + longer	26.7411	Full-PCV	London	No		0.03	S	0.01	S	1	4	0	2	0	2	1_0_0	ST199	15B/C	S. pneumoniae	6	4	-	-	-	-	-	-	-	-	-	0.98	-	No
CAPIT183_D1-1	SAMN25119079	SRR21202291	ERS13449518	ERR10183509	Lower + shorter	51.1498	Full-PCV	London	No		0.03	S	0.03	S	2	3	0	0	2	0	2_0_2	ST73	15A	S. pneumoniae	43	16	-	-	-	-	-	-	-	-	-	-	-	-
CAPIT184_D1-1	SAMN25119080	SRR21202290	ERS13449519	ERR10183510	Higher + longer	14.2247	Full-PCV	London	No		0.03	S	0.01	S	0	4	0	2	0	2	0_0_0	ST2220	15B/C	S. pneumoniae	6	4	-	-	-	-	-	-	-	-	-	-	-	-
CAPIT185_D1-1	SAMN25119081	SRR21202289	ERS13449520	ERR10183511	Higher + longer	14.9146	Full-PCV	Yorkshire and the Humber	No		0.01	S	0.01	S	2	3	0	0	6	3	2_0_6	ST717	33F	S. pneumoniae	18	3	1	-	-	-	1	0.99	-	-	-	-	-	Yes
CAPIT186_D1-1	SAMN25119082	SRR21202288	ERS13449521	ERR10183512	Higher + shorter	12.9763	Full-PCV	Yorkshire and the Humber	No		0.01	S	0.01	S	2	3	6	2	0	2	2_6_0	ST62	11A	S. pneumoniae	1	3	-	-	-	-	-	-	-	-	-	-	-	-
CAPIT187_D1-1	SAMN25119083	SRR21202287	ERS13449522	ERR10183513	Lower + longer	18.0355	Full-PCV	Yorkshire and the Humber	No		0.03	S	0.01	S	2	2	0	1	6	3	2_0_6	ST992	23A	S. pneumoniae	8	7	-	-	-	-	-	-	-	-	-	-	-	-
CAPIT188_D1-1	SAMN25119084	SRR21202286	ERS13449523	ERR10183514	Lower + shorter	28.1866	Full-PCV	Yorkshire and the Humber	No		0.01	S	0.01	S	2	3	0	0	6	3	2_0_6	ST100	33F	S. pneumoniae	18	3	-	-	-	-	-	-	-	-	-	-	-	-
CAPIT189_D1-1	SAMN25119085	SRR21202120	ERS13449524	ERR10183515	Higher + shorter	28.9422	NA	East Midlands	No		0.03	S	0.01	S	0	4	0	0	2	0	0_0_2	ST198	35B	S. pneumoniae	9	72	-	-	-	-	-	-	-	-	-	-	-	-
CAPIT189_D29-1	SAMN25119086	SRR21202119	ERS13449525	ERR10183516	Higher + shorter	28.9422	NA	East Midlands	No		0.03	S	0.01	S	2	2	0	1	2	1	2_0_2	ST193	21	S. pneumoniae	4	11	-	0.99	-	-	-	-	-	-	-	-	-	-
CAPIT190_D1-1	SAMN25119087	SRR21202118	ERS13449526	ERR10183517	Higher + shorter	45.8279	Full-PCV	East Midlands	No		0.03	S	0.01	S	2	3	0	1	2	1	2_0_2	ST8711	15B/C	S. pneumoniae	3	11	-	-	-	-	-	-	-	-	-	-	-	-
CAPIT191_D29-1	SAMN25119088	SRR21202116	ERS13449527	ERR10183518	Lower + longer	27.1682	Full-PCV	East Midlands	Yes	Amoxicillin	0.03	S	0.03	S	0	6	0	0	2	1	0_0_2	ST816	10A	S. pneumoniae	15	36	-	-	-	-	-	-	-	-	-	-	-	-
CAPIT192_D1-1	SAMN25119089	SRR21202115	ERS13449528	ERR10183519	Lower + longer	19.251	Full-PCV	East Midlands	No		0.03	S	0.01	S	0	6	0	0	53	2	0_0_53	ST1551	10A	S. pneumoniae	17	35	-	-	-	-	-	-	-	-	-	-	-	-
CAPIT193_D1-1	SAMN25119090	SRR21202114	ERS13449529	ERR10183520	Lower + longer	20.8607	NA	East Midlands	No		0.03	S	0.01	S	3	5	6	2	5	3	3_6_5	ST53	08	S. pneumoniae	26	3	-	-	-	-	-	-	-	-	-	-	-	-
CAPIT193_D1-2	SAMN25119091	SRR21202113	ERS13449530	ERR10183521	Lower + longer	20.8607	NA	East Midlands	No		0.03	S	0.01	S	11	5	0	1	0	2	11_0_0	Unknown ST	34	S. pneumoniae	16	49	-	-	-	-	-	-	-	-	-	-	-	-
CAPIT194_D1-1	SAMN25119092	SRR21202112	ERS13449531	ERR10183522	Higher + longer	23.2589	Full-PCV	East Midlands	No		0.03	S	0.01	S	2	3	0	1	6	3	2_0_6	ST438	23A	S. pneumoniae	8	7	-	-	-	-	-	-	-	-	-	-	-	-
CAPIT195_D1-1	SAMN25119093	SRR21202111	ERS13449532	ERR10183523	Higher + shorter	29.205	Full-PCV	East Midlands	Yes	Amoxicillin	0.01	S	0.01	S	78	4	0	0	0	1	78_0_0	ST162	Serogroup 24	S. pneumoniae	2	6	-	-	-	-	-	-	-	-	-	-	-	-
CAPIT196_D1-1	SAMN25119094	SRR21202110	ERS13449533	ERR10183524	Higher + longer	61.728	Full-PCV	East Midlands	No		0.03	S	0.01	S	1	3	0	0	0	1	1_0_0	ST3811	15A	S. pneumoniae	2	6	-	-	-	-	-	-	-	-	-	-	-	-
CAPIT196_D29-1	SAMN25119095	SRR21202109	ERS13449534	ERR10183525	Higher + longer	61.728	Full-PCV	East Midlands	No		0.03	S	0.03	S	0	3	4	2	2	0	0_4_2	ST398	06C	S. pneumoniae	29	13	-	-	-	-	-	-	-	-	-	-	-	-
CAPIT197_D1-1	SAMN25119096	SRR21202108	ERS13449535	ERR10183526	Lower + shorter	43.8568	Full-PCV	East Midlands	No		0.01	S	0.01	S	0	4	0	0	3	1	0_0_3	ST1635	35F	S. pneumoniae	5	36	-	-	-	-	-	-	-	-	-	-	-	-
CAPIT198_D1-1	SAMN25119097	SRR21202107	ERS13449536	ERR10183527	Higher + shorter	20.2365	Full-PCV	East Midlands	No		0.03	S	0.01	S	2	3	0	1	2	1	2_0_2	ST8711	15B/C	S. pneumoniae	3	11	-	-	-	-	-	-	-	-	-	-	-	-
CAPIT199_D29-1	SAMN25119098	SRR21202105	ERS13449537	ERR10183528	Higher + longer	40.7359	Full-PCV	East Midlands	No		0.03	S	0.01	S	2	3	0	0	6	3	2_0_6	ST100	33F	S. pneumoniae	18	3	-	-	-	-	-	-	-	-	-	-	-	-
CAPIT200_D1-1	SAMN25119099	SRR21202104	ERS13449538	ERR10183529	Lower + shorter	18.2326	Full-PCV	East Midlands	No		0.03	S	0.01	S	11	4	0	0	0	2	11_0_0	ST574	13	S. pneumoniae	42	323	-	-	-	-	-	-	-	-	-	-	-	-
CAPIT201_D1-1	SAMN25119100	SRR21202103	ERS13449539	ERR10183530	Lower + shorter	20.5979	Full-PCV	East Midlands	No		0.03	S	0.01	S	2	3	0	1	2	1	2_0_2	ST8711	15B/C	S. pneumoniae	3	11	-	-	-	-	-	-	-	-	-	-	-	-
CAPIT202_D1-1	SAMN25119101	SRR21202102	ERS13449540	ERR10183531	Higher + shorter	42.9369	Full-PCV	East Midlands	No		0.01	S	0.01	S	86	56	82	4	162	4	86_82_162	ST448	Non-typeable/NCC2a	S. pneumoniae	14	60	-	-	-	-	-	-	-	-	-	-	-	-
CAPIT202_D29-1	SAMN25119102	SRR21202101	ERS13449541	ERR10183532	Higher + shorter	42.9369	Full-PCV	East Midlands	No		0.03	S	0.01	S	1	4	0	2	187	2	1_0_187	ST199	19A	S. pneumoniae	6	4	-	-	-	-	-	-	-	-	-	-	-	-
CAPIT203_D1-1	SAMN25119103	SRR21202100	ERS13449542	ERR10183533	Higher + shorter	14.4218	Full-PCV	East Midlands	No		0.01	S	0.01	S	0	6	0	0	2	0	0_0_2	ST97	10A	S. pneumoniae	17	35	-	-	-	-	-	-	-	-	-	-	-	-
CAPIT204_D1-1	SAMN25119104	SRR21202099	ERS13449543	ERR10183534	Higher + shorter	13.929	Full-PCV	East Midlands	No		0.25	I	0.25	S	7	50	12	20	New	29	7_12_New	ST156	11A	S. pneumoniae	2	6	-	-	-	-	-	-	-	-	-	-	-	-
CAPIT205_D1-1	SAMN25119105	SRR21202098	ERS13449544	ERR10183535	Lower + longer	26.7411	Full-PCV	East Midlands	No		0.03	S	0.01	S	0	4	6	3	2	0	0_6_2	ST30	16F	S. pneumoniae	19	46	-	-	-	-	-	-	-	-	-	-	-	-
CAPIT206_D1-1	SAMN25119106	SRR21202097	ERS13449545	ERR10183536	Higher + longer	32.7201	Full-PCV	East Midlands	No		0.01	S	0.01	S	1	3	0	0	0	1	1_0_0	ST3811	15A	S. pneumoniae	2	6	-	-	-	-	-	-	-	-	-	-	-	-
CAPIT207_D1-1	SAMN25119107	SRR21202096	ERS13449546	ERR10183537	Higher + longer	11.728	Partial-PCV	East Midlands	No		0.03	S	0.01	S	0	6	0	0	2	1	0_0_2	ST2068	10A	S. pneumoniae	15	36	-	-	-	-	-	-	-	-	-	-	-	-
CAPIT208_D1-1	SAMN25119108	SRR21202094	ERS13449547	ERR10183538	Lower + shorter	41.1629	Full-PCV	East Midlands	No		0.01	S	0.01	S	2	3	0	1	2	1	2_0_2	ST8711	15B/C	S. pneumoniae	3	11	-	-	-	-	-	-	-	-	-	-	-	-
CAPIT208_D1-2	SAMN25119109	SRR21202093	ERS13449548	ERR10183539	Lower + shorter	41.1629	Full-PCV	East Midlands	No		0.25	I	0.03	S	7	50	67	9	1	54	7_67_1	ST2372	23B1	S. pneumoniae	7	5	-	-	-	-	-	-	-	-	-	-	-	-
CAPIT209_D29-1	SAMN25119110	SRR21202092	ERS13449549	ERR10183540	Lower + longer	39.5532	Full-PCV	East Midlands	Yes	Amoxicillin	0.01	S	0.01	S	1	4	0	0	0	2	1_0_0	ST177	Serogroup 24	S. pneumoniae	10	44	-	-	-	-	-	-	-	-	-	-	-	-
CAPIT210_D29-1	SAMN25119111	SRR21202091	ERS13449550	ERR10183541	Lower + shorter	13.9947	Full-PCV	East Midlands	Yes	Co-amoxiclav	0.01	S	0.01	S	1	3	0	0	0	1	1_0_0	ST3811	15A	S. pneumoniae	2	6	-	-	-	-	-	-	-	-	-	-	-	-
CAPIT211_D1-1	SAMN25119112	SRR21202090	ERS13449551	ERR10183542	Higher + longer	11.1367	Partial-PCV	East Midlands	Yes	Amoxicillin	0.03	S	0.01	S	0	4	0	0	3	1	0_0_3	ST8604	35F	S. pneumoniae	5	36	-	-	-	-	-	-	-	-	-	-	-	-
CAPIT211_D29-1	SAMN25119113	SRR21202089	ERS13449552	ERR10183543	Higher + longer	11.1367	Partial-PCV	East Midlands	Yes	Amoxicillin	0.03	S	0.01	S	1	3	0	0	0	1	1_0_0	ST3811	15A	S. pneumoniae	2	6	-	-	-	-	-	-	-	-	-	-	-	-
CAPIT212_D29-1	SAMN25119114	SRR21202088	ERS13449553	ERR10183544	Higher + longer	15.8344	Full-PCV	London	No		0.03	S	0.03	S	0	4	0	2	0	3	0_0_0	ST199	15B/C	S. pneumoniae	6	4	-	-	-	-	-	-	-	-	-	-	-	-
CAPIT213_D1-1	SAMN25119115	SRR21202087	ERS13449554	ERR10183545	Higher + shorter	47.799	Full-PCV	London	No		0.03	S	0.01	S	0	6	0	0	53	2	0_0_53	ST1551	10A	S. pneumoniae	17	35	-	-	-	-	-	-	-	-	-	-	-	-
CAPIT214_D1-1	SAMN25119116	SRR21202086	ERS13449555	ERR10183546	Lower + shorter	40.5388	Full-PCV	London	No		1	I	1	I	34	56	32	19	43	72	34_32_43	ST179	19F	S. pneumoniae	41	44	0.99	-	-	-	1	0.98	-	-	-	-	-	Yes
CAPIT215_D29-1	SAMN25119117	SRR21202085	ERS13449556	ERR10183547	Lower + shorter	12.6807	Full-PCV	London	No		0.01	S	0.01	S	1	3	0	0	0	1	1_0_0	ST162	15B/C	S. pneumoniae	2	6	-	-	-	-	-	-	1	1	-	-	-	No
CAPIT216_D29-1	SAMN25119118	SRR21202083	ERS13449557	ERR10183548	Lower + longer	24.7372	Full-PCV	London	No		0.01	S	0.01	S	0	4	0	0	2	0	0_0_2	ST11227	35D	S. pneumoniae	9	72	-	-	-	-	-	-	-	-	-	-	-	-
CAPIT217_D1-1	SAMN25119119	SRR21202082	ERS13449558	ERR10183549	Higher + longer	17.3784	Full-PCV	London	No		0.01	S	0.01	S	1	3	0	0	0	1	1_0_0	ST3811	15A	S. pneumoniae	2	6	-	-	-	-	-	-	-	-	-	-	-	-
CAPIT218_D1-1	SAMN25119120	SRR21202081	ERS13449559	ERR10183550	Higher + longer	17.2142	Full-PCV	London	No		0.01	S	0.01	S	1	3	0	0	0	1	1_0_0	ST162	15B/C	S. pneumoniae	2	6	-	-	-	-	-	-	1	1	-	-	-	No
CAPIT219_D1-1	SAMN25119121	SRR21202080	ERS13449560	ERR10183551	Lower + shorter	34.2641	Full-PCV	London	No		0.06	S	0.03	S	0	4	0	0	New	40	0_0_New	ST4346	35B	S. pneumoniae	9	72	-	-	-	-	-	-	-	-	-	-	-	-
CAPIT220_D1-1	SAMN25119122	SRR21202079	ERS13449561	ERR10183552	Higher + longer	13.4363	Full-PCV	London	Yes	Amoxicillin	0.01	S	0.01	S	1	3	0	0	0	1	1_0_0	ST162	15B/C	S. pneumoniae	2	6	-	-	-	-	-	-	1	1	-	-	-	No
CAPIT221_D1-1	SAMN25119123	SRR21202078	ERS13449562	ERR10183553	Lower + longer	17.5099	Full-PCV	London	Yes	Amoxicillin	0.125	I	0.125	S	23	5	27	16	77	17	23_27_77	ST3774	12F	S. pneumoniae	21	55	-	-	-	-	-	-	-	-	-	-	-	-
CAPIT222_D1-1	SAMN25119124	SRR21202077	ERS13449563	ERR10183554	Higher + shorter	43.1997	Full-PCV	Ireland	No		0.03	S	0.03	S	0	4	0	2	0	1	0_0_0	ST439	23B	S. pneumoniae	22	7	-	-	-	-	-	-	-	-	-	-	-	-
CAPIT222_D29-1	SAMN25119125	SRR21202076	ERS13449564	ERR10183555	Higher + shorter	43.1997	Full-PCV	Ireland	No		0.5	I	0.25	S	New	91	60	6	New	70	New_60_New	Unknown ST	Non-typeable/NCC2b	S. pneumoniae	14	60	-	-	-	-	-	-	-	-	-	-	-	-
CAPIT223_D1-1	SAMN25119126	SRR21202075	ERS13449565	ERR10183556	Lower + shorter	34.4284	NA	Ireland	No		0.03	S	0.03	S	2	3	0	1	6	3	2_0_6	ST438	23A	S. pneumoniae	8	7	-	-	-	-	-	-	-	-	-	-	-	-
CAPIT223_D29-1	SAMN25119127	SRR21202074	ERS13449566	ERR10183557	Lower + shorter	34.4284	NA	Ireland	No		0.25	I	0.25	S	24	39	27	16	28	27	24_27_28	ST63	15A	S. pneumoniae	13	9	0.99	-	-	-	1	99%,99%	-	-	-	-	-	No
CAPIT224_D1-1	SAMN25119128	SRR21202072	ERS13449567	ERR10183558	Higher + longer	11.5637	Partial-PCV	North West	No		0.03	S	0.01	S	1	4	2	3	2	1	1_2_2	ST433	22F	S. pneumoniae	11	19	-	-	-	-	-	-	-	-	-	-	-	-
CAPIT224_D29-1	SAMN25119129	SRR21202071	ERS13449568	ERR10183559	Higher + longer	11.5637	Partial-PCV	North West	No		0.03	S	0.01	S	1	4	0	2	187	2	1_0_187	ST199	19A	S. pneumoniae	6	4	-	-	-	-	-	-	-	-	-	-	-	-
CAPIT225_D1-1	SAMN25119130	SRR21202070	ERS13449569	ERR10183560	Lower + longer	8.04862	Partial-PCV	North West	No		0.01	S	0.01	S	2	3	6	2	0	2	2_6_0	ST62	11A	S. pneumoniae	1	3	-	-	-	-	-	-	-	-	-	-	-	-
CAPIT226_D1-1	SAMN25119131	SRR21202069	ERS13449570	ERR10183561	Lower + shorter	38.6991	Full-PCV	North West	No		0.01	S	0.01	S	1	4	0	2	187	2	1_0_187	ST199	19A	S. pneumoniae	6	4	-	-	-	-	-	-	-	-	-	-	-	-
CAPIT227_D1-1	SAMN25119132	SRR21202068	ERS13449571	ERR10183562	Higher + longer	20.3351	Full-PCV	North West	No		0.01	S	0.01	S	0	4	0	0	3	1	0_0_3	ST1635	35F	S. pneumoniae	5	36	-	-	-	-	-	-	-	-	-	-	-	-
CAPIT228_D1-1	SAMN25119133	SRR21202067	ERS13449572	ERR10183563	Higher + shorter	16.4258	Full-PCV	North West	No		0.01	S	0.01	S	1	3	0	0	0	1	1_0_0	ST3811	15A	S. pneumoniae	2	6	-	-	-	-	-	-	-	-	-	-	-	-
CAPIT229_D29-1	SAMN25119134	SRR21202066	ERS13449573	ERR10183564	Higher + longer	26.8068	Full-PCV	North West	No		0.03	S	0.01	S	2	3	0	1	2	1	2_0_2	ST8711	15B/C	S. pneumoniae	3	11	-	-	-	-	-	-	-	-	-	-	-	-
CAPIT230_D29-1	SAMN25119135	SRR21202065	ERS13449574	ERR10183565	Lower + longer	13.1078	Full-PCV	North West	Yes	Phenoxymethylpenicillin	0.03	S	0.01	S	2	2	0	1	0	1	2_0_0	ST654	19F	S. pneumoniae	33	119	-	-	-	-	-	-	-	-	-	-	-	-
CAPIT231_D1-1	SAMN25119136	SRR21202064	ERS13449575	ERR10183566	Higher + longer	63.272	Full-PCV	East Midlands	No		0.01	S	0.01	S	2	2	0	1	2	1	2_0_2	ST193	21	S. pneumoniae	4	11	-	0.99	-	-	-	-	-	-	-	-	-	-
CAPIT232_D29-1	SAMN25119137	SRR21202063	ERS13449576	ERR10183567	Lower + longer	14.9474	Full-PCV	East Midlands	No		0.03	S	0.01	S	0	6	0	0	2	0	0_0_2	ST97	10A	S. pneumoniae	17	35	-	-	-	-	-	-	-	-	-	-	-	-
CAPIT233_D1-1	SAMN25119138	SRR21202061	ERS13449577	ERR10183568	Higher + longer	17.7398	Full-PCV	East Midlands	No		0.01	S	0.01	S	2	5	0	1	0	2	2_0_0	ST273	06E (06B)	S. pneumoniae	39	23	0.99	-	-	-	-	0.99	-	-	-	-	-	Yes
CAPIT234_D1-1	SAMN25119139	SRR21202060	ERS13449578	ERR10183569	Higher + shorter	28.0552	Full-PCV	East Midlands	No		0.01	S	0.01	S	1	4	0	2	187	2	1_0_187	ST450	19A	S. pneumoniae	6	4	-	-	-	-	-	-	-	-	-	-	-	-
CAPIT235_D1-1	SAMN25119140	SRR21202059	ERS13449579	ERR10183570	Higher + shorter	33.8042	No-PCV	East Midlands	No		0.01	S	0.01	S	2	3	6	2	0	2	2_6_0	ST62	11A	S. pneumoniae	1	3	-	-	-	-	-	-	-	-	-	-	-	-
CAPIT235_D1-2	SAMN25119141	SRR21202058	ERS13449580	ERR10183571	Higher + shorter	33.8042	No-PCV	East Midlands	No		0.01	S	0.01	S	86	56	82	4	162	4	86_82_162	ST448	Non-typeable/NCC2a	S. pneumoniae	14	60	-	-	-	-	-	-	-	-	-	-	-	-
CAPIT236_D1-1	SAMN25119142	SRR21202057	ERS13449581	ERR10183572	Higher + shorter	23.3903	Full-PCV	South East	No		0.03	S	0.01	S	1	4	0	3	0	2	1_0_0	ST199	15B/C	S. pneumoniae	6	4	-	-	-	-	-	-	-	-	-	-	-	-
CAPIT237_D29-1	SAMN25119143	SRR21202056	ERS13449582	ERR10183573	Higher + longer	57.3259	Full-PCV	South East	No		0.03	S	0.01	S	0	4	0	2	0	1	0_0_0	ST439	23B	S. pneumoniae	22	7	-	-	-	-	-	-	-	-	-	-	-	-
CAPIT238_D1-1	SAMN25119144	SRR21202055	ERS13449583	ERR10183574	Higher + longer	53.1209	Full-PCV	South East	No		0.03	S	0.01	S	2	4	0	0	3	1	2_0_3	ST177	07C	S. pneumoniae	10	44	-	-	-	-	-	-	-	-	-	-	-	-
CAPIT238_D29-1	SAMN25119145	SRR21202054	ERS13449584	ERR10183575	Higher + longer	53.1209	Full-PCV	South East	No		0.03	S	0.01	S	0	4	0	1	0	3	0_0_0	ST452	35B	S. pneumoniae	25	75	-	-	-	-	-	-	-	-	-	-	-	-
CAPIT239_D1-1	SAMN25119146	SRR21202053	ERS13449585	ERR10183576	Lower + shorter	33.6399	Full-PCV	South East	No		0.03	S	0.03	S	0	4	6	3	2	0	0_6_2	ST30	16F	S. pneumoniae	19	46	-	-	-	-	-	-	-	-	-	-	-	-
CAPIT239_D29-1	SAMN25119147	SRR21202052	ERS13449586	ERR10183577	Lower + shorter	33.6399	Full-PCV	South East	No		0.03	S	0.01	S	2	2	0	1	2	1	2_0_2	ST1877	21	S. pneumoniae	4	11	-	0.99	-	-	-	-	-	-	-	-	-	-
CAPIT240_D1-1	SAMN25119148	SRR21202050	ERS13449587	ERR10183578	Higher + shorter	17.2142	Full-PCV	South East	No		0.01	S	0.03	S	0	4	0	2	0	1	0_0_0	ST439	23B	S. pneumoniae	22	7	-	-	-	-	-	-	-	-	-	-	-	-
CAPIT240_D29-1	SAMN25119149	SRR21202049	ERS13449588	ERR10183579	Higher + shorter	17.2142	Full-PCV	South East	No		0.25	I	0.06	S	7	50	67	9	1	54	7_67_1	ST2372	23B1	S. pneumoniae	7	5	-	-	-	-	-	-	-	-	-	-	-	-
CAPIT241_D29-1	SAMN25119150	SRR21202048	ERS13449589	ERR10183580	Higher + shorter	18.9882	Full-PCV	South East	No		0.03	S	0.01	S	78	4	0	0	0	1	78_0_0	ST162	Serogroup 24	S. pneumoniae	2	6	-	-	-	-	-	-	-	-	-	-	-	-
CAPIT242_D1-1	SAMN25119151	SRR21202047	ERS13449590	ERR10183581	Higher + shorter	22.8318	Full-PCV	South East	No		0.03	S	0.01	S	1	4	0	2	0	2	1_0_0	ST199	15B/C	S. pneumoniae	6	4	-	-	-	-	-	-	-	-	-	-	-	-
CAPIT243_D1-1	SAMN25119152	SRR21202046	ERS13449591	ERR10183582	Higher + longer	26.3141	Full-PCV	South East	No		0.01	S	0.01	S	2	2	0	1	0	2	2_0_0	ST8606	17F	S. pneumoniae	16	49	-	-	-	-	-	-	-	-	-	-	-	-
CAPIT244_D29-1	SAMN25119153	SRR21202045	ERS13449592	ERR10183583	Lower + shorter	24.5401	Full-PCV	South East	No		0.03	S	0.01	S	11	4	0	4	172	3	11_0_172	ST1924	17F	S. pneumoniae	16	49	-	-	-	-	-	-	-	-	-	-	-	-
CAPIT245_D29-1	SAMN25119154	SRR21202044	ERS13449593	ERR10183584	Lower + shorter	28.548	Full-PCV	South East	No		0.03	S	0.03	S	2	2	0	1	2	1	2_0_2	ST193	15B/C	S. pneumoniae	4	11	-	-	-	-	0.99	0.99	-	-	-	-	-	Yes
CAPIT246_D1-1	SAMN25119155	SRR21202043	ERS13449594	ERR10183585	Higher + longer	32.0959	Full-PCV	South East	No		0.25	I	0.03	S	24	40	27	16	28	27	24_27_28	ST63	15A	S. pneumoniae	13	9	0.99	-	-	-	1	0.99	-	-	-	-	-	Yes
CAPIT247_D1-1	SAMN25119156	SRR21202042	ERS13449595	ERR10183586	Lower + longer	10.5125	Partial-PCV	South East	No		0.03	S	0.01	S	0	4	0	0	2	1	0_0_2	ST198	35B	S. pneumoniae	9	72	-	-	-	-	-	-	-	-	-	-	-	-
CAPIT248_D1-1	SAMN25119157	SRR21202041	ERS13449596	ERR10183587	Lower + longer	18.8568	Full-PCV	South East	No		0.01	S	0.01	S	0	4	0	2	0	2	0_0_0	ST2220	15B/C	S. pneumoniae	6	4	-	-	-	-	-	-	-	-	-	-	-	-
CAPIT248_D29-1	SAMN25119158	SRR21202039	ERS13449597	ERR10183588	Lower + longer	18.8568	Full-PCV	South East	No		0.01	S	0.01	S	2	3	6	2	0	2	2_6_0	ST62	11A	S. pneumoniae	1	3	-	-	-	-	-	-	-	-	-	-	-	-
CAPIT249_D1-1	SAMN25119159	SRR21202038	ERS13449598	ERR10183589	Lower + longer	40.3745	Full-PCV	South East	No		0.01	S	0.01	S	2	4	4	2	0	1	2_4_0	ST393	38	S. pneumoniae	23	38	-	-	-	-	-	-	-	-	-	-	-	-
CAPIT250_D29-1	SAMN25119160	SRR21202037	ERS13449599	ERR10183590	Lower + longer	36.8922	Full-PCV	South East	Yes	Amoxicillin	0.03	S	0.01	S	1	4	2	3	2	0	1_2_2	ST433	22F	S. pneumoniae	11	19	-	-	-	-	-	-	-	-	-	-	-	-
CAPIT251_D29-1	SAMN25119161	SRR21202036	ERS13449600	ERR10183591	Lower + longer	32.293	Full-PCV	East Midlands	No		1	I	1	I	4	88	7	21	7	74	4_7_7	ST558	35B	S. pneumoniae	38	59	-	-	-	-	-	-	-	-	-	-	-	-
CAPIT252_D1-1	SAMN25119162	SRR21202035	ERS13449601	ERR10183592	Lower + longer	20.4008	Full-PCV	East Midlands	No		0.01	S	0.01	S	1	3	0	0	0	1	1_0_0	ST162	15B/C	S. pneumoniae	2	6	-	-	-	-	-	-	-	-	-	-	-	-
CAPIT253_D29-1	SAMN25119163	SRR21202034	ERS13449602	ERR10183593	Lower + shorter	44.0539	Full-PCV	East Midlands	No		0.01	S	0.01	S	78	4	0	0	0	1	78_0_0	ST162	Serogroup 24	S. pneumoniae	2	6	-	-	-	0.92	-	-	-	-	-	-	-	-
CAPIT254_D1-1	SAMN25119164	SRR21202033	ERS13449603	ERR10183594	Higher + shorter	18.8896	Full-PCV	East Midlands	No		0.03	S	0.01	S	0	6	0	0	53	2	0_0_53	ST1551	10A	S. pneumoniae	17	35	-	-	-	-	-	-	-	-	-	-	-	-
CAPIT254_D29-1	SAMN25119165	SRR21202032	ERS13449604	ERR10183595	Higher + shorter	18.8896	Full-PCV	East Midlands	No		0.03	S	0.03	S	2	2	0	1	2	1	2_0_2	ST193	21	S. pneumoniae	4	11	-	-	-	-	-	-	-	-	-	-	-	-
CAPIT255_D1-1	SAMN25119166	SRR21202031	ERS13449605	ERR10183596	Lower + longer	23.5874	Full-PCV	East Midlands	No		0.01	S	0.01	S	2	3	6	2	0	2	2_6_0	ST62	11A	S. pneumoniae	1	3	-	-	-	-	-	-	-	-	-	-	-	-
CAPIT256_D29-1	SAMN25119167	SRR21202030	ERS13449606	ERR10183597	Higher + longer	16.8857	Full-PCV	East Midlands	No		0.01	S	0.01	S	2	3	6	2	0	2	2_6_0	ST62	11A	S. pneumoniae	1	3	-	-	-	-	-	-	-	-	-	-	-	-
CAPIT257_D1-1	SAMN25119168	SRR21202027	ERS13449607	ERR10183598	Higher + longer	7.62155	Partial-PCV	East Midlands	No		0.01	S	0.01	S	1	4	2	3	2	0	1_2_2	ST433	22F	S. pneumoniae	11	19	-	-	-	-	-	-	-	-	-	-	-	-
CAPIT258_D1-1	SAMN25119169	SRR21202026	ERS13449608	ERR10183599	Lower + longer	26.544	Full-PCV	East Midlands	No		0.01	S	0.01	S	2	3	6	2	0	2	2_6_0	ST62	11A	S. pneumoniae	1	3	-	-	-	-	-	-	-	-	-	-	-	-
CAPIT259_D1-1	SAMN25119170	SRR21202025	ERS13449609	ERR10183600	Higher + shorter	14.1919	Full-PCV	East Midlands	No		0.03	S	0.01	S	2	3	6	2	0	2	2_6_0	ST62	11A	S. pneumoniae	1	3	-	-	-	-	-	-	-	-	-	-	-	-
CAPIT260_D1-1	SAMN25119171	SRR21202285	ERS13449610	ERR10183601	Higher + shorter	41.5243	Full-PCV	East Midlands	No		0.03	S	0.01	S	2	2	0	1	2	1	2_0_2	ST193	21	S. pneumoniae	4	11	-	-	-	-	-	-	-	-	-	-	-	-
CAPIT261_D29-1	SAMN25119172	SRR21202284	ERS13449611	ERR10183602	Higher + longer	68.1669	Full-PCV	East Midlands	No		0.03	S	0.01	S	0	4	6	3	2	0	0_6_2	ST30	16F	S. pneumoniae	19	46	-	-	-	-	-	-	-	-	-	-	-	-
CAPIT262_D1-1	SAMN25119173	SRR21202283	ERS13449612	ERR10183603	Higher + shorter	39.1261	Full-PCV	East Midlands	No		0.01	S	0.01	S	2	3	6	2	10	3	2_6_10	ST62	11A	S. pneumoniae	1	3	-	-	-	-	-	-	-	-	-	-	-	-
CAPIT263_D1-1	SAMN25119174	SRR21202282	ERS13449613	ERR10183604	Lower + longer	46.6491	Full-PCV	East Midlands	No		0.01	S	0.01	S	2	4	0	0	3	1	2_0_3	ST177	07C	S. pneumoniae	10	44	-	-	-	-	-	-	-	-	-	-	-	-
CAPIT264_D1-1	SAMN25119175	SRR21202281	ERS13449614	ERR10183605	Lower + shorter	44.021	Full-PCV	East Midlands	No		0.01	S	0.01	S	2	3	0	1	6	3	2_0_6	ST100	33F	S. pneumoniae	18	3	-	-	-	-	-	-	-	-	-	-	-	-
CAPIT265_D1-1	SAMN25119176	SRR21202280	ERS13449615	ERR10183606	Lower + longer	54.2707	Full-PCV	East Midlands	No		0.03	S	0.01	S	2	3	0	1	2	1	2_0_2	Unknown ST	15B/C	S. pneumoniae	3	11	-	-	-	-	-	-	-	-	-	-	-	-
CAPIT265_D29-1	SAMN25119177	SRR21202279	ERS13449616	ERR10183607	Lower + longer	54.2707	Full-PCV	East Midlands	No		0.25	I	0.125	S	7	50	1	40	171	45	7_1_171	ST7121	23B1	S. pneumoniae	7	5	-	-	-	-	-	-	-	-	-	-	-	-
CAPIT266_D1-1	SAMN25119178	SRR21202277	ERS13449617	ERR10183608	Lower + shorter	32.4901	Full-PCV	East Midlands	No		0.01	S	0.01	S	2	3	6	2	0	2	2_6_0	ST62	11A	S. pneumoniae	1	3	-	-	-	-	-	-	-	-	-	-	-	-
CAPIT267_D1-1	SAMN25119179	SRR21202276	ERS13449618	ERR10183609	Higher + shorter	34.4612	Full-PCV	East Midlands	No		0.01	S	0.03	S	2	3	6	2	0	2	2_6_0	ST62	11A	S. pneumoniae	1	3	-	-	-	-	-	-	-	-	-	-	-	-
CAPIT268_D1-1	SAMN25119180	SRR21202275	ERS13449619	ERR10183610	Lower + longer	19.5466	Full-PCV	East Midlands	No		0.03	S	0.03	S	2	2	0	1	6	3	2_0_6	ST42	23A	S. pneumoniae	8	7	-	-	-	-	-	-	-	-	-	-	-	-
CAPIT268_D29-1	SAMN25119181	SRR21202274	ERS13449620	ERR10183611	Lower + longer	19.5466	Full-PCV	East Midlands	No		0.03	S	0.01	S	1	3	0	0	0	1	1_0_0	ST3811	15A	S. pneumoniae	2	6	-	-	-	-	-	-	-	-	-	-	-	-
CAPIT269_D29-1	SAMN25119182	SRR21202273	ERS13449621	ERR10183612	Higher + longer	10.5782	Partial-PCV	East Midlands	No		0.01	S	0.01	S	2	3	6	2	0	2	2_6_0	ST62	11A	S. pneumoniae	1	3	-	-	-	-	-	-	-	-	-	-	-	-
CAPIT270_D29-1	SAMN25119183	SRR21202272	ERS13449622	ERR10183613	Lower + shorter	20.4008	Full-PCV	East Midlands	No		0.01	S	0.01	S	86	56	82	4	162	4	86_82_162	ST448	Non-typeable/NCC2a	S. pneumoniae	14	60	-	-	-	-	-	-	-	-	-	-	-	-
CAPIT271_D29-1	SAMN25119184	SRR21202271	ERS13449623	ERR10183614	Higher + shorter	15.0788	Full-PCV	East Midlands	No		0.03	S	0.01	S	0	4	0	1	3	1	0_0_3	ST1635	35F	S. pneumoniae	5	36	-	-	-	-	-	-	-	-	-	-	-	-
CAPIT272_D1-1	SAMN25119185	SRR21202270	ERS13449624	ERR10183615	Higher + longer	13.4363	Full-PCV	East Midlands	No		0.01	S	0.01	S	1	3	0	0	0	1	1_0_0	ST3811	15A	S. pneumoniae	2	6	-	-	-	-	-	-	-	-	-	-	-	-
CAPIT273_D1-1	SAMN25119186	SRR21202269	ERS13449625	ERR10183616	Higher + shorter	32.6873	Full-PCV	East Midlands	No		0.01	S	0.01	S	78	4	0	0	0	1	78_0_0	ST162	Serogroup 24	S. pneumoniae	2	6	-	-	-	-	-	-	-	-	-	-	-	-
CAPIT273_USV-1	SAMN25119187	SRR21202268	ERS13449626	ERR10183617	Higher + shorter	32.6873	Full-PCV	East Midlands	No		0.03	S	0.01	S	2	3	6	2	0	2	2_6_0	ST62	11A	S. pneumoniae	1	3	-	-	-	-	-	-	-	-	-	-	-	-
CAPIT274_D29-1	SAMN25119188	SRR21202266	ERS13449627	ERR10183618	Lower + longer	45.795	Full-PCV	East Midlands	Yes	Amoxicillin	0.01	S	0.01	S	0	4	New	1	3	1	0_New_3	ST1635	35F	S. pneumoniae	5	36	-	-	-	-	-	-	-	-	-	-	-	-
CAPIT275_D29-1	SAMN25119189	SRR21202265	ERS13449628	ERR10183619	Higher + longer	22.8318	Full-PCV	East Midlands	Yes	Co-amoxiclav	0.25	I	0.25	S	84	53	New	16	New	55	84_New_New	ST6038	15B/C	S. pneumoniae	37	25	-	1	-	-	-	-	-	-	-	-	-	-
CAPIT276_D29-1	SAMN25119190	SRR21202264	ERS13449629	ERR10183620	Higher + longer	14.7503	Full-PCV	East Midlands	Yes	Amoxicillin	0.01	S	0.01	S	86	56	82	4	162	4	86_82_162	ST448	Non-typeable/NCC2a	S. pneumoniae	14	60	-	-	-	-	-	-	-	-	-	-	-	-
CAPIT277_D1-1	SAMN25119191	SRR21202263	ERS13449630	ERR10183621	Higher + shorter	29.0736	Full-PCV	East Midlands	No		0.01	S	0.01	S	2	3	0	1	2	1	2_0_2	ST8711	15B/C	S. pneumoniae	3	11	-	-	-	-	-	-	-	-	-	-	-	-
CAPIT278_D29-1	SAMN25119192	SRR21202262	ERS13449631	ERR10183622	Higher + shorter	23.5874	Full-PCV	East Midlands	Yes	Amoxicillin	0.01	S	0.01	S	2	3	3	2	2	0	2_3_2	ST180	03	S. pneumoniae	12	12	-	-	-	-	-	-	-	-	-	-	-	-
CAPIT279_D1-1	SAMN25119193	SRR21202261	ERS13449632	ERR10183623	Higher + longer	18.8568	NA	London	No		0.25	I	0.06	S	7	50	1	40	1	54	7_1_1	ST1349	23B1	S. pneumoniae	7	5	-	-	-	-	-	-	-	-	-	-	-	-
CAPIT280_D1-1	SAMN25119194	SRR21202260	ERS13449633	ERR10183624	Lower + shorter	49.5072	Full-PCV	London	No		0.03	S	0.03	S	2	2	0	1	6	3	2_0_6	ST438	23A	S. pneumoniae	8	7	-	-	-	-	-	-	-	-	-	-	-	-
CAPIT281_D1-1	SAMN25119195	SRR21202259	ERS13449634	ERR10183625	Higher + longer	26.8397	Full-PCV	London	No		0.01	S	0.01	S	0	4	0	2	0	1	0_0_0	ST355	23B	S. pneumoniae	22	7	-	-	-	-	-	-	-	-	-	-	-	-
CAPIT282_D1-1	SAMN25119196	SRR21202258	ERS13449635	ERR10183626	Higher + shorter	23.9159	Full-PCV	London	No		0.03	S	0.03	S	0	4	0	0	3	1	0_0_3	Unknown ST	35F	S. pneumoniae	5	36	-	-	-	-	-	-	-	-	-	-	-	-
CAPIT283_D1-1	SAMN25119197	SRR21202257	ERS13449636	ERR10183627	Lower + shorter	42.707	Full-PCV	London	No		0.03	S	0.01	S	0	4	0	0	0	2	0_0_0	ST1818	34	S. pneumoniae	31	45	-	-	-	-	-	-	-	-	-	-	-	-
CAPIT284_D1-1	SAMN25119198	SRR21202255	ERS13449637	ERR10183628	Lower + shorter	25.3942	Full-PCV	Yorkshire and the Humber	No		0.03	S	0.01	S	2	3	6	2	0	2	2_6_0	ST62	11A	S. pneumoniae	1	3	-	-	-	-	-	-	-	-	-	-	-	-
CAPIT284_D29-1	SAMN25119199	SRR21202254	ERS13449638	ERR10183629	Lower + shorter	25.3942	Full-PCV	Yorkshire and the Humber	No		0.03	S	0.01	S	0	4	0	0	2	0	0_0_2	ST198	35B	S. pneumoniae	9	72	-	-	-	-	-	-	-	-	-	-	-	-
CAPIT285_D1-1	SAMN25119200	SRR21201958	ERS13449639	ERR10183630	Lower + longer	63.1735	Full-PCV	Yorkshire and the Humber	No		0.25	I	0.125	S	New	19	New	16	New	37	New_New_New	ST701	13	S. pneumoniae	36	65	-	-	-	-	-	-	-	-	-	-	-	-
CAPIT286_D1-1	SAMN25119201	SRR21201957	ERS13449640	ERR10183631	Higher + longer	33.18	Full-PCV	Yorkshire and the Humber	No		0.01	S	0.01	S	2	3	0	1	2	1	2_0_2	ST1262	15B/C	S. pneumoniae	3	11	-	0.99	-	-	-	-	-	-	-	-	-	-
CAPIT287_D1-1	SAMN25119202	SRR21201956	ERS13449641	ERR10183632	Lower + longer	52.3325	Full-PCV	Yorkshire and the Humber	No		0.03	S	0.01	S	2	2	0	1	6	3	2_0_6	ST438	23A	S. pneumoniae	8	7	-	-	-	-	-	-	-	-	-	-	-	-
CAPIT288_D1-1	SAMN25119203	SRR21201955	ERS13449642	ERR10183633	Higher + shorter	46.8791	Full-PCV	Yorkshire and the Humber	No		0.03	S	0.03	S	2	2	0	1	6	3	2_0_6	ST438	23A	S. pneumoniae	8	7	-	-	-	-	-	-	-	-	-	-	-	-
CAPIT289_D1-1	SAMN25119204	SRR21201954	ERS13449643	ERR10183634	Lower + shorter	41.1301	Full-PCV	Yorkshire and the Humber	No		0.125	I	0.125	S	16	26	13	14	19	15	16_13_19	ST2062	19A	S. pneumoniae	35	17	-	-	-	-	-	-	-	-	-	-	-	-
CAPIT290_D1-1	SAMN25119205	SRR21201953	ERS13449644	ERR10183635	Lower + shorter	11.1695	Partial-PCV	Yorkshire and the Humber	No		0.03	S	0.03	S	2	3	3	2	New	1	2_3_New	ST180	03	S. pneumoniae	12	12	-	-	-	-	-	-	-	-	-	-	-	-
CAPIT291_D1-1	SAMN25119206	SRR21201952	ERS13449645	ERR10183636	Lower + longer	34.7569	Full-PCV	Yorkshire and the Humber	No		0.01	S	0.01	S	1	4	0	0	0	2	1_0_0	ST66	09N	S. pneumoniae	24	16	-	-	-	-	-	-	-	-	-	-	-	-
CAPIT292_D1-1	SAMN25119207	SRR21201951	ERS13449646	ERR10183637	Higher + shorter	36.7608	Full-PCV	Yorkshire and the Humber	Yes	Amoxicillin	0.01	S	0.01	S	2	4	0	0	3	1	2_0_3	ST177	07C	S. pneumoniae	10	44	-	-	-	-	-	-	-	-	-	-	-	-
CAPIT293_D1-1	SAMN25119208	SRR21201949	ERS13449647	ERR10183638	Lower + shorter	38.4691	Full-PCV	Yorkshire and the Humber	Yes	Amoxicillin	0.125	I	0.06	S	7	50	67	9	1	54	7_67_1	ST2372	23B1	S. pneumoniae	7	5	-	-	-	-	-	-	-	-	-	-	-	-
CAPIT294_D1-1	SAMN25119209	SRR21201948	ERS13449648	ERR10183639	Higher + shorter	23.1275	Full-PCV	Yorkshire and the Humber	Yes	Amoxicillin	0.03	S	0.03	S	0	3	0	0	3	1	0_0_3	ST58	15A	S. pneumoniae	32	140	-	-	-	-	-	-	-	-	-	-	-	-
CAPIT295_D1-1	SAMN25119210	SRR21201947	ERS13449649	ERR10183640	Higher + longer	12.5493	Full-PCV	Yorkshire and the Humber	Yes	Amoxicillin	0.01	S	0.01	S	0	4	0	0	2	0	0_0_2	ST3003	35D	S. pneumoniae	9	72	-	-	-	-	-	-	-	-	-	-	-	-
CAPIT296_D1-1	SAMN25119211	SRR21201946	ERS13449650	ERR10183641	Higher + longer	14.8489	Full-PCV	Yorkshire and the Humber	Yes	Amoxicillin	0.01	S	0.01	S	2	2	0	1	2	1	2_0_2	ST193	21	S. pneumoniae	4	11	-	-	-	-	-	-	-	-	-	-	-	-
CAPIT297_D29-1	SAMN25119212	SRR21201945	ERS13449651	ERR10183642	Lower + shorter	31.8988	Full-PCV	Yorkshire and the Humber	Yes	Amoxicillin	0.03	S	0.01	S	1	4	2	3	2	0	1_2_2	ST433	22F	S. pneumoniae	11	19	-	-	-	-	-	-	-	-	-	-	-	-
CAPIT298_D1-1	SAMN25119213	SRR21201944	ERS13449652	ERR10183643	Higher + shorter	58.5414	Full-PCV	Yorkshire and the Humber	Yes	Amoxicillin	0.01	S	0.01	S	2	4	0	0	3	1	2_0_3	ST177	07C	S. pneumoniae	10	44	-	-	-	-	-	-	-	-	-	-	-	-
CAPIT299_D1-1	SAMN25119214	SRR21201943	ERS13449653	ERR10183644	Higher + longer	14.9146	Full-PCV	South East	No		0.01	S	0.01	S	1	4	2	3	2	0	1_2_2	ST433	22F	S. pneumoniae	1	19	-	-	-	-	-	-	-	-	-	-	-	-
CAPIT299_D1-2	SAMN25119215	SRR21201942	ERS13449654	ERR10183645	Higher + longer	14.9146	Full-PCV	South East	No		0.01	S	0.01	S	2	3	6	2	0	2	2_6_0	ST62	11A	S. pneumoniae	23	3	-	-	-	-	-	-	-	-	-	-	-	-
CAPIT299_D29-1	SAMN25119216	SRR21201941	ERS13449655	ERR10183646	Higher + longer	14.9146	Full-PCV	South East	No		0.03	S	0.03	S	2	4	4	2	0	1	2_4_0	ST393	38	S. pneumoniae	20	38	-	-	-	-	-	-	-	-	-	-	-	-
CAPIT300_D1-1	SAMN25119217	SRR21201940	ERS13449656	ERR10183647	Lower + longer	29.1064	Full-PCV	South East	No		0.125	I	0.06	S	0	3	1	40	1	54	0_1_1	ST1373	23B1	S. pneumoniae	12	5	-	-	-	-	-	-	-	-	-	-	-	-
CAPIT301_D1-1	SAMN25119218	SRR21201938	ERS13449657	ERR10183648	Lower + longer	48.5217	Full-PCV	South East	No		0.03	S	0.03	S	2	3	3	2	2	0	2_3_2	ST180	03	S. pneumoniae	2	12	-	-	-	-	-	-	-	-	-	-	-	-
CAPIT302_D1-1	SAMN25119219	SRR21201937	ERS13449658	ERR10183649	Higher + longer	17.0171	Full-PCV	South East	No		0.03	S	0.03	S	1	3	0	0	0	1	1_0_0	ST3811	15A	S. pneumoniae	6	6	-	-	-	-	-	-	-	-	-	-	-	-
CAPIT303_D1-1	SAMN25119220	SRR21201936	ERS13449659	ERR10183650	Higher + shorter	24.3758	Full-PCV	South East	No		0.03	S	0.03	S	0	4	0	2	0	2	0_0_0	ST2220	15B/C	S. pneumoniae	8	4	-	-	-	-	-	-	-	-	-	-	-	-
CAPIT304_D1-1	SAMN25119221	SRR21201935	ERS13449660	ERR10183651	Lower + shorter	18.134	Full-PCV	South East	No		0.01	S	0.01	S	2	2	0	1	6	3	2_0_6	ST438	23A	S. pneumoniae	10	7	-	-	-	-	-	-	-	-	-	-	-	-
CAPIT305_D1-1	SAMN25119222	SRR21201934	ERS13449661	ERR10183652	Higher + shorter	43.0026	Full-PCV	South East	No		0.06	S	0.03	S	23	6	6	1	139	26	23_6_139	ST7024	19F	S. pneumoniae	22	44	0.98	-	-	-	1	0.99	-	-	1	-	-	Yes
CAPIT305_D1-2	SAMN25119223	SRR21201933	ERS13449662	ERR10183653	Higher + shorter	43.0026	Full-PCV	South East	No		0.03	S	0.03	S	0	4	0	2	0	1	0_0_0	ST439	23B	S. pneumoniae	2	7	-	-	-	-	-	-	-	-	-	-	-	-
CAPIT306_D1-1	SAMN25119224	SRR21201932	ERS13449663	ERR10183654	Higher + shorter	47.6347	NA	South East	No		0.03	S	0.01	S	1	3	0	0	0	1	1_0_0	ST162	15B/C	S. pneumoniae	21	6	-	-	-	-	-	-	-	-	-	-	-	-
CAPIT307_D1-1	SAMN25119225	SRR21201931	ERS13449664	ERR10183655	Lower + longer	62.3193	Full-PCV	South East	Yes	Ceftriaxone	0.06	S	0.03	S	23	5	4	2	77	17	23_4_77	ST8060	12F	S. pneumoniae	3	55	-	0.99	-	-	-	-	-	-	-	-	-	-
CAPIT308_D29-1	SAMN25119226	SRR21201930	ERS13449665	ERR10183656	Higher + shorter	44.1524	Full-PCV	South East	Yes	Ceftriaxone	0.03	S	0.01	S	2	3	0	1	2	1	2_0_2	ST1262	15B/C	S. pneumoniae	7	11	-	0.99	-	-	-	-	-	-	-	-	-	-
CAPIT309_D29-1	SAMN25119227	SRR21201929	ERS13449666	ERR10183657	Lower + shorter	15.703	Full-PCV	South East	Yes	Ceftriaxone	0.25	I	0.06	S	7	50	1	40	1	54	7_1_1	ST1349	23B1	S. pneumoniae	11	5	-	-	-	-	-	-	-	-	-	-	-	-
CAPIT310_D1-1	SAMN25119228	SRR21201927	ERS13449667	ERR10183658	Higher + shorter	15.3745	Full-PCV	South East	No		0.125	I	0.06	S	0	3	1	40	1	54	0_1_1	ST1373	23B1	S. pneumoniae	20	5	-	-	-	-	-	-	-	-	-	-	-	-
CAPIT311_D1-1	SAMN25119229	SRR21202184	ERS13449668	ERR10183659	Higher + shorter	55.9461	Full-PCV	South East	No		0.03	S	0.06	S	2	3	3	2	2	0	2_3_2	ST180	03	S. pneumoniae	12	12	-	-	-	-	-	-	-	-	-	-	-	-
CAPIT312_D1-1	SAMN25119230	SRR21202183	ERS13449669	ERR10183660	Higher + longer	56.7017	Full-PCV	North East	No		0.03	S	0.01	S	2	2	0	2	6	3	2_0_6	ST438	23A	S. pneumoniae	8	7	-	-	-	-	-	-	-	-	-	-	-	-
CAPIT312_D29-1	SAMN25119231	SRR21202182	ERS13449670	ERR10183661	Higher + longer	56.7017	Full-PCV	North East	No		0.03	S	0.01	S	78	4	0	0	0	1	78_0_0	ST162	Serogroup 24	S. pneumoniae	2	6	-	-	-	-	-	-	-	-	-	-	-	-
CAPIT313_D1-1	SAMN25119232	SRR21202181	ERS13449671	ERR10183662	Lower + shorter	10.2825	Partial-PCV	North East	No		0.03	S	0.01	S	3	5	6	2	5	3	3_6_5	ST53	08	S. pneumoniae	26	3	-	-	-	-	-	-	-	-	-	-	-	-
CAPIT314_D1-1	SAMN25119233	SRR21202180	ERS13449672	ERR10183663	Higher + shorter	24.4744	Full-PCV	North East	No		0.03	S	0.01	S	0	4	0	0	3	1	0_0_3	ST1635	35F	S. pneumoniae	5	36	-	-	-	-	-	-	-	-	-	-	-	-
CAPIT314_D29-1	SAMN25119234	SRR21202179	ERS13449673	ERR10183664	Higher + shorter	24.4744	Full-PCV	North East	No		0.03	S	0.01	S	2	2	0	1	6	3	2_0_6	ST992	23A	S. pneumoniae	8	7	-	-	-	-	-	-	-	-	-	-	-	-
CAPIT315_D1-1	SAMN25119235	SRR21202178	ERS13449674	ERR10183665	Lower + shorter	44.251	Full-PCV	North East	#N/A	#N/A	0.03	S	0.01	S	2	3	6	2	0	2	2_6_0	ST62	11A	S. pneumoniae	1	3	-	-	-	-	-	-	1	1	-	-	-	No
CAPIT316_D1-1	SAMN25119236	SRR21202177	ERS13449675	ERR10183666	Lower + longer	22.7332	Full-PCV	North East	No		0.03	S	0.01	S	0	4	0	2	0	2	0_0_0	ST2220	15B/C	S. pneumoniae	6	4	-	-	-	-	-	-	-	-	-	-	-	-
CAPIT317_D1-1	SAMN25119237	SRR21202176	ERS13449676	ERR10183667	Higher + longer	27.1682	Full-PCV	North East	No		0.03	S	0.01	S	2	2	0	1	0	2	2_0_0	ST8606	17F	S. pneumoniae	16	49	-	-	-	-	-	-	-	-	-	-	-	-
CAPIT317_D29-1	SAMN25119238	SRR21202174	ERS13449677	ERR10183668	Higher + longer	27.1682	Full-PCV	North East	No		0.03	S	0.03	S	0	4	0	0	0	2	0_0_0	ST1818	34	S. pneumoniae	31	45	-	-	-	-	-	-	-	-	-	-	-	-
CAPIT318_D1-1	SAMN25119239	SRR21202173	ERS13449678	ERR10183669	Lower + shorter	10.0526	Partial-PCV	North East	No		0.03	S	0.01	S	0	6	0	0	2	1	0_0_2	ST2068	10A	S. pneumoniae	15	36	-	-	-	-	-	-	-	-	-	-	-	-
CAPIT319_D1-1	SAMN25119240	SRR21202172	ERS13449679	ERR10183670	Lower + longer	31.0118	Full-PCV	North East	No		0.01	S	0.01	S	0	4	0	0	3	1	0_0_3	ST1635	35F	S. pneumoniae	5	36	-	-	-	-	-	-	-	-	-	-	-	-
CAPIT320_D1-1	SAMN25119241	SRR21202171	ERS13449680	ERR10183671	Higher + longer	33.7057	Full-PCV	North East	No		0.01	S	0.01	S	2	2	0	1	2	1	2_0_2	ST193	21	S. pneumoniae	4	11	-	-	-	-	-	-	-	-	-	-	-	-
CAPIT321_D1-1	SAMN25119242	SRR21202170	ERS13449681	ERR10183672	Lower + longer	42.0828	Full-PCV	North East	No		0.01	S	0.01	S	78	4	0	0	0	1	78_0_0	ST162	Serogroup 24	S. pneumoniae	2	6	-	-	-	-	-	-	-	-	-	-	-	-
CAPIT322_D29-1	SAMN25119243	SRR21202169	ERS13449682	ERR10183673	Higher + longer	41.9514	Full-PCV	North East	No		0.03	S	0.01	S	2	3	0	1	2	1	2_0_2	ST1262	15B/C	S. pneumoniae	3	11	-	-	-	-	-	-	-	-	-	-	-	-
CAPIT323_D1-1	SAMN25119244	SRR21202168	ERS13449683	ERR10183674	Lower + shorter	45.0066	Full-PCV	North East	No		0.01	S	0.01	S	86	56	82	4	162	4	86_82_162	ST448	Non-typeable/NCC2a	S. pneumoniae	14	60	-	-	-	-	-	-	-	-	-	-	-	-
CAPIT324_D1-1	SAMN25119245	SRR21202167	ERS13449684	ERR10183675	Lower + shorter	43.5611	Full-PCV	North East	No		0.01	S	0.01	S	2	3	3	2	2	0	2_3_2	ST180	03	S. pneumoniae	12	12	-	-	-	-	-	-	-	-	-	-	-	-
CAPIT325_D1-1	SAMN25119246	SRR21202166	ERS13449685	ERR10183676	Lower + shorter	7.45729	Partial-PCV	North East	No		0.03	S	0.01	S	2	3	0	0	6	3	2_0_6	ST4668	33F	S. pneumoniae	18	3	1	-	-	-	1	0.99	-	-	-	-	-	Yes
CAPIT326_D1-1	SAMN25119247	SRR21202165	ERS13449686	ERR10183677	Higher + shorter	25.3942	Full-PCV	North East	No		0.03	S	0.01	S	2	3	0	1	2	1	2_0_2	ST193	21	S. pneumoniae	4	11	-	-	-	-	-	-	-	-	-	-	-	-
CAPIT327_D1-1	SAMN25119248	SRR21202163	ERS13449687	ERR10183678	Higher + shorter	31.6032	Full-PCV	North East	No		0.01	S	0.01	S	2	4	0	0	3	1	2_0_3	ST177	07C	S. pneumoniae	10	44	-	-	-	-	-	-	-	-	-	-	-	-
CAPIT328_D1-1	SAMN25119249	SRR21202162	ERS13449688	ERR10183679	Lower + longer	15.1445	Full-PCV	North East	No		0.03	S	0.01	S	23	5	0	0	0	2	23_0_0	ST405	09N	S. pneumoniae	34	32	-	-	-	-	-	-	-	-	-	-	-	-
CAPIT329_D1-1	SAMN25119250	SRR21202161	ERS13449689	ERR10183680	Higher + longer	53.7122	Full-PCV	North East	No		0.125	I	0.03	S	0	3	1	40	1	54	0_1_1	ST11816	23B1	S. pneumoniae	20	5	-	-	-	-	-	-	-	-	-	-	-	-
CAPIT330_D1-1	SAMN25119251	SRR21202160	ERS13449690	ERR10183681	Lower + longer	25.5585	Full-PCV	North East	No		0.01	S	0.01	S	0	4	0	0	0	2	0_0_0	ST177	23B	S. pneumoniae	10	44	-	-	-	-	-	-	-	-	-	-	-	-
CAPIT330_D29-1	SAMN25119252	SRR21202159	ERS13449691	ERR10183682	Lower + longer	25.5585	Full-PCV	North East	No		0.03	S	0.03	S	0	4	6	3	2	0	0_6_2	ST30	16F	S. pneumoniae	19	46	-	-	-	-	-	-	-	-	-	-	-	-
CAPIT331_D1-1	SAMN25119253	SRR21202158	ERS13449692	ERR10183683	Higher + longer	59.067	Full-PCV	North East	No		0.01	S	0.01	S	1	4	2	3	2	1	1_2_2	ST433	22F	S. pneumoniae	11	19	-	-	-	-	-	-	-	-	-	-	-	-
CAPIT332_D1-1	SAMN25119254	SRR21202157	ERS13449693	ERR10183684	Higher + longer	16.2615	Full-PCV	North East	No		0.03	S	0.03	S	2	2	0	1	2	1	2_0_2	ST193	21	S. pneumoniae	4	11	-	-	-	-	-	-	-	-	-	-	-	-
CAPIT333_D29-1	SAMN25119255	SRR21202156	ERS13449694	ERR10183685	Lower + shorter	39.5861	Full-PCV	North East	Yes	Amoxicillin	0.125	I	0.03	S	7	50	0	0	1	54	7_0_1	ST177	23B1	S. pneumoniae	10	44	-	-	-	-	-	-	-	-	-	-	-	-
CAPIT334_D29-1	SAMN25119256	SRR21202155	ERS13449695	ERR10183686	Higher + longer	36.6623	Full-PCV	North East	Yes	Amoxicillin	0.03	S	0.01	S	0	4	0	0	3	1	0_0_3	ST1635	35F	S. pneumoniae	5	36	-	-	-	-	-	-	-	-	-	-	-	-
CAPIT335_D29-1	SAMN25119257	SRR21202154	ERS13449696	ERR10183687	Lower + shorter	32.8187	Full-PCV	North East	Yes	Amoxicillin	0.01	S	0.01	S	2	3	6	2	0	2	2_6_0	ST62	11A	S. pneumoniae	1	3	-	-	-	-	-	-	1	1	-	-	-	No
