# Supplementary material for: High-resolution genomics identifies pneumococcal diversity and persistence of vaccine types in children with community-acquired pneumonia in the UK and Ireland
Source: BMC Microbiol. 2024 Apr 27;24:146. doi: 10.1186/s12866-024-03300-w (PMC11055344; doi:10.1186/s12866-024-03300-w)
Supplement: Supplementary file 2 — Additional File 2. Table S2 [file 12866_2024_3300_MOESM2_ESM.xlsx]

## Sheet: Blad1
Table S2. Collection of isolates included in the recombination analysis. As every long-read sequenced isolate presenting serotypes 19A and 19F belonged to a different ST, all isolates belonging to those same STs were retrieved
Strain	Year	Host	Source	ST	Serotype	ENA_accession	Disease_status	GPSC_cluster	Serotype_3_clade
UoS3299	2009	human	nasopharynx	ST162	19F	ERR046134	carriage	6
UoS0221	2007	human	nasopharynx	ST162	19F	ERR044912	carriage	6
UoS0288	2007	human	nasopharynx	ST162	19F	ERR044938	carriage	6
UoS0289	2007	human	nasopharynx	ST162	19F	ERR044939	carriage	6
UoS0049	2006	human	nasopharynx	ST162	19F	ERR044868	carriage	6
UoS2240	2008	human	nasopharynx	ST162	19F	ERR045023	carriage	6
UoS0257	2007	human	nasopharynx	ST162	19F	ERR044923	carriage	6
UoS0233	2007	human	nasopharynx	ST162	19F	ERR044915	carriage	6
PHESPV1221	2015	human		ST162	19F	ERR1440010		6
PHESPD0097	2003	human		ST162	19F	ERR1438016		6
759521	2002	human		ST162	09V	ERR3530486		6
759520	2002	human		ST162	09V	ERR3530373		6
757977	2002	human		ST162	09V	ERR3530974		6
756683	2002	human		ST162	09V	ERR3530576		6
756625	2002	human		ST162	09V	ERR3530852		6
755701	2002	human		ST162	09V	ERR3530924		6
753416	2002	human		ST162	09V	ERR3530693		6
717896	2013	human		ST162	15B/C	ERR3530721		6
304261	2016	human		ST162	15B/C	ERR3531010		6
304260	2016	human		ST162	15B/C	ERR3530471		6
300860	2016	human		ST162	15B/C	ERR3531019		6
300859	2016	human		ST162	15B/C	ERR3530690		6
760602	2002	human		ST162	19F	ERR3530829		6
760601	2002	human		ST162	19F	ERR3530318		6
760600	2002	human		ST162	19F	ERR3530344		6
760599	2002	human		ST162	19F	ERR3530889		6
759512	2002	human		ST162	19F	ERR3531060		6
758021	2002	human		ST162	19F	ERR3530571		6
758018	2002	human		ST162	19F	ERR3530285		6
757971	2002	human		ST162	19F	ERR3531110		6
757959	2002	human		ST162	19F	ERR3530384		6
757938	2002	human		ST162	19F	ERR3530512		6
756614	2002	human		ST162	19F	ERR3530972		6
756597	2002	human		ST162	19F	ERR3531095		6
755704	2002	human		ST162	19F	ERR3530580		6
753485	2002	human		ST162	19F	ERR3530886		6
753482	2002	human		ST162	19F	ERR3531123		6
753453	2002	human		ST162	19F	ERR3530677		6
753451	2002	human		ST162	19F	ERR3530394		6
720979	2009	human		ST162	19F	ERR3530804		6
720234	2009	human		ST162	19F	ERR3530581		6
720273	2013	human		ST162	Serogroup_24	ERR3530550		6
717988	2013	human		ST162	Serogroup_24	ERR3530718		6
717985	2013	human		ST162	Serogroup_24	ERR3530928		6
717966	2013	human		ST162	Serogroup_24	ERR3530322		6
717934	2013	human		ST162	Serogroup_24	ERR3530604		6
717932	2013	human		ST162	Serogroup_24	ERR3531023		6
717928	2013	human		ST162	Serogroup_24	ERR3530551		6
717926	2013	human		ST162	Serogroup_24	ERR3530503		6
717916	2013	human		ST162	Serogroup_24	ERR3530976		6
308597	2016	human		ST162	Serogroup_24	ERR3530806		6
304269	2016	human		ST162	Serogroup_24	ERR3530700		6
304264	2016	human		ST162	Serogroup_24	ERR3530855		6
304262	2016	human		ST162	Serogroup_24	ERR3530499		6
CAPIT026_D29-1	2017	human	nasopharynx	ST162	Serogroup_24	ERR10112472		6
CAPIT027_D1-1	2017	human	nasopharynx	ST162	Serogroup_24	ERR10112473		6
CAPIT086_D1-1	2018	human	nasopharynx	ST162	Serogroup_24	ERR10112541		6
CAPIT143_D29-1	2018	human	nasopharynx	ST162	Serogroup_24	ERR10112609		6
CAPIT195_D1-1	2018	human	nasopharynx	ST162	Serogroup_24	ERR10112668		6
CAPIT215_D29-1	2018	human	nasopharynx	ST162	15B/C	ERR10112692		6
CAPIT218_D1-1	2018	human	nasopharynx	ST162	15B/C	ERR10112695		6
CAPIT220_D1-1	2019	human	nasopharynx	ST162	15B/C	ERR10112697		6
CAPIT241_D29-1	2018	human	nasopharynx	ST162	Serogroup_24	ERR10112725		6
CAPIT252_D1-1	2017	human	nasopharynx	ST162	15B/C	ERR10112737		6
CAPIT253_D29-1	2017	human	nasopharynx	ST162	Serogroup_24	ERR10112738		6
CAPIT273_D1-1	2019	human	nasopharynx	ST162	Serogroup_24	ERR10112761		6
CAPIT306_D1-1	2018	human	nasopharynx	ST162	15B/C	ERR10112799		6
CAPIT312_D29-1	2017	human	nasopharynx	ST162	Serogroup_24	ERR10112806		6
CAPIT321_D1-1	2018	human	nasopharynx	ST162	Serogroup_24	ERR10112817		6
UoS0165	2007	human	nasopharynx	ST177	19F	ERR044898	carriage	44
UoS0008	2011	human	nasopharynx	ST177	19F	ERR044858	carriage	44
PHESPV1262	2015	human		ST177	19F	ERR1440051		44
PHESPD0806	2000	human		ST177	19F	ERR1438725		44
720996	2013	human		ST177	07C	ERR3530688		44
660130	2018	human		ST177	07C	ERR3530841		44
652822	2018	human		ST177	07C	ERR3530380		44
651033	2018	human		ST177	07C	ERR3530321		44
308596	2016	human		ST177	07C	ERR3530492		44
757955	2002	human		ST177	19F	ERR3530352		44
753455	2002	human		ST177	19F	ERR3531118		44
720989	2013	human		ST177	Serogroup_24	ERR3530868		44
717939	2013	human		ST177	Serogroup_24	ERR3530994		44
717882	2013	human		ST177	Serogroup_24	ERR3531092		44
651026	2018	human		ST177	Serogroup_24	ERR3530526		44
642768	2018	human		ST177	Serogroup_24	ERR3530874		44
308629	2016	human		ST177	Serogroup_24	ERR3531106		44
308603	2016	human		ST177	Serogroup_24	ERR3530331		44
CAPIT018_D1-2	2018	human	nasopharynx	ST177	21	ERR10112462		44
CAPIT078_D1-1	2017	human	nasopharynx	ST177	07C	ERR10112532		44
CAPIT145_D29-1	2018	human	nasopharynx	ST177	07C	ERR10112611		44
CAPIT209_D29-1	2017	human	nasopharynx	ST177	Serogroup_24	ERR10112685		44
CAPIT238_D1-1	2017	human	nasopharynx	ST177	07C	ERR10112719		44
CAPIT263_D1-1	2018	human	nasopharynx	ST177	07C	ERR10112749		44
CAPIT292_D1-1	2017	human	nasopharynx	ST177	07C	ERR10112782		44
CAPIT298_D1-1	2019	human	nasopharynx	ST177	07C	ERR10112788		44
CAPIT327_D1-1	2018	human	nasopharynx	ST177	07C	ERR10112823		44
CAPIT330_D1-1	2019	human	nasopharynx	ST177	23B	ERR10112826		44
CAPIT333_D29-1	2018	human	nasopharynx	ST177	23B1	ERR10112830		44
UoS2134	2008	human	nasopharynx	ST179	19F	ERR044999	carriage	44
UoS2054	2008	human	nasopharynx	ST179	19F	ERR044982	carriage	44
UoS2298	2008	human	nasopharynx	ST179	19F	ERR045040	carriage	44
UoS0322	2007	human	nasopharynx	ST179	19F	ERR044960	carriage	44
UoS0317	2007	human	nasopharynx	ST179	19F	ERR044955	carriage	44
PHESPV0521	2014	human		ST179	19F	ERR1439310		44
PHESPV1223	2015	human		ST179	19F	ERR1440012		44
PHESPV1364	2015	human		ST179	19F	ERR1440151		44
PHESPV1365	2015	human		ST179	19F	ERR1440152		44
758019	2002	human		ST179	19F	ERR3530538		44
756663	2002	human		ST179	19F	ERR3530717		44
CAPIT214_D1-1	2018	human	nasopharynx	ST179	19F	ERR10112691		44
BHN582	1995	human	blood	ST180	3	ERR026230	bacteraemia	12	clade_Ia
UoS4133	2009	human	nasopharynx	ST180	3	ERR046176	carriage	12	clade_Ia
UoS0272	2007	human	nasopharynx	ST180	3	ERR044929	carriage	12	clade_Ia
UoS3033	2008	human	nasopharynx	ST180	3	ERR046055	carriage	12	clade_Ia
UoS3205	2009	human	nasopharynx	ST180	3	ERR046102	carriage	12	clade_Ia
UoS0103	2006	human	nasopharynx	ST180	3	ERR044882	carriage	12	clade_Ia
UoS5023	2010	human	nasopharynx	ST180	3	ERR045405	carriage	12	clade_Ia
UoS4027	2009	human	nasopharynx	ST180	3	ERR046150	carriage	12	clade_Ia
UoS2370	2008	human	nasopharynx	ST180	3	ERR048220	carriage	12	clade_Ia
SPnOXC141	2001	human	nasopharynx	ST180	3		carriage	12	clade_Ia
Sp99_4038	1999	human	blood	ST180	3		bacteraemia	12	clade_Ia
Sp99_4039	1999	human	cerebrospinal_fluid	ST180	3		meningitis	12	clade_Ia
Sp02-1198	2002	human		ST180	3			12	clade_Ia
UOS_6021	2011	human	nasopharynx	ST180	3	ERR657181	carriage	12	clade_Ia
UOS_6100	2012	human	nasopharynx	ST180	3	ERR775451	carriage	12	clade_Ia
UOS_6160	2012	human	nasopharynx	ST180	3	ERR657209	carriage	12	clade_Ia
UOS_6188	2012	human	nasopharynx	ST180	3	ERR657308	carriage	12	clade_Ia
PHESPV0001	2004	human		ST180	3	ERR1438791		12	clade_Ia
PHESPV0053	2010	human		ST180	3	ERR1438843		12	clade_II
PHESPV0102	2010	human		ST180	3	ERR1438892		12	clade_Ia
PHESPV0123	2010	human		ST180	3	ERR1438913		12	clade_Ia
PHESPV0697	2014	human		ST180	3	ERR1439486		12	clade_Ia
PHESPV0713	2014	human		ST180	3	ERR1439502		12	clade_Ia
PHESPV0722	2014	human		ST180	3	ERR1439511		12	clade_Ia
PHESPV0740	2014	human		ST180	3	ERR1439529		12	clade_Ia
PHESPV0898	2015	human		ST180	3	ERR1439687		12	clade_II
PHESPV0989	2015	human		ST180	3	ERR1439778		12	clade_Ia
PHESPV1116	2015	human		ST180	3	ERR1439905		12	clade_Ia
PHESPV1125	2015	human		ST180	3	ERR1439914		12	clade_Ia
PHESPV1145	2015	human		ST180	3	ERR1439934		12	clade_Ia
PHESPV1150	2015	human		ST180	3	ERR1439939		12	clade_Ia
PHESPV1159	2015	human		ST180	3	ERR1439948		12	clade_Ia
PHESPV1164	2015	human		ST180	3	ERR1439953		12	clade_II
PHESPV1173	2015	human		ST180	3	ERR1439962		12	clade_Ia
PHESPV1198	2015	human		ST180	3	ERR1439987		12	clade_Ia
PHESPV1201	2015	human		ST180	3	ERR1439990		12	clade_Ia
PHESPV1234	2015	human		ST180	3	ERR1440023		12	clade_II
PHESPV1249	2015	human		ST180	3	ERR1440038		12	clade_Ia
PHESPV1251	2015	human		ST180	3	ERR1440040		12	clade_Ia
PHESPV1284	2015	human		ST180	3	ERR1440073		12	clade_Ia
PHESPV1312	2015	human		ST180	3	ERR1440101		12	clade_Ia
PHESPV1318	2015	human		ST180	3	ERR1440107		12	clade_II
PHESPV1322	2015	human		ST180	3	ERR1440111		12	clade_II
PHESPV1328	2015	human		ST180	3	ERR1440117		12	clade_II
PHESPV1333	2015	human		ST180	3	ERR1440122		12	clade_II
PHESPV1357	2015	human		ST180	3	ERR1440144		12	clade_II
PHESPV1451	2015	human		ST180	3	ERR1440237		12	clade_Ia
PHESPV1481	2015	human		ST180	3	ERR1440266		12	clade_Ia
PHESPV1511	2015	human		ST180	3	ERR1440296		12	clade_Ia
PHESPV1746	2016	human		ST180	3	ERR1440531		12	clade_Ia
PHESPV1755	2016	human		ST180	3	ERR1440540		12	clade_Ia
PHESPV1766	2016	human		ST180	3	ERR1440551		12	clade_Ia
PHESPV1786	2016	human		ST180	3	ERR1440571		12	clade_Ia
PHESPV1796	2016	human		ST180	3	ERR1440581		12	clade_Ia
PHESPV1798	2016	human		ST180	3	ERR1440583		12	clade_II
PHESPV1803	2016	human		ST180	3	ERR1440588		12	clade_Ia
PHESPD0486	2013	human		ST180	3	ERR1438405		12	clade_II
PHESPD0566	2013	human		ST180	3	ERR1438485		12	clade_Ia
PHESPD0804	2000	human		ST180	3	ERR1438723		12	clade_Ia
OXC141	2001	human	nasopharynx	ST180	3		carriage	12	clade_Ia
759505	2002	human		ST180	3	ERR3530628		12	clade_Ia
756681	2002	human		ST180	3	ERR3530319		12	clade_Ia
756613	2002	human		ST180	3	ERR3530278		12	clade_Ia
720252	2009	human		ST180	3	ERR3530912		12	clade_Ia
720249	2009	human		ST180	3	ERR3530911		12	clade_Ia
720248	2009	human		ST180	3	ERR3530764		12	clade_Ia
720210	2009	human		ST180	3	ERR3530920		12	clade_Ia
720199	2009	human		ST180	3	ERR3530705		12	clade_Ia
720198	2009	human		ST180	3	ERR3530561		12	clade_Ia
717902	2013	human		ST180	3	ERR3530475		12	clade_Ia
651036	2018	human		ST180	3	ERR3530755		12	clade_II
308591	2016	human		ST180	3	ERR3531049		12	clade_Ia
304293	2016	human		ST180	3	ERR3531053		12	clade_II
304271	2016	human		ST180	3	ERR3530735		12	clade_II
CAPIT038_D1-1	2017	human	nasopharynx	ST180	3	ERR10112486		12	clade_Ia
CAPIT079_D1-2	2017	human	nasopharynx	ST180	3	ERR10112534		12	clade_II
CAPIT106_D1-1	2018	human	nasopharynx	ST180	3	ERR10112566		12	clade_Ia
CAPIT114_D29-1	2018	human	nasopharynx	ST180	3	ERR10112575		12	clade_II
CAPIT119_D1-1	2017	human	nasopharynx	ST180	3	ERR10112583		12	clade_Ia
CAPIT125_D1-1	2018	human	nasopharynx	ST180	3	ERR10112590		12	clade_II
CAPIT126_D1-1	2018	human	nasopharynx	ST180	3	ERR10112591		12	clade_Ia
CAPIT136_D1-1	2019	human	nasopharynx	ST180	3	ERR10112602		12	clade_Ia
CAPIT278_D29-1	2018	human	nasopharynx	ST180	3	ERR10112767		12	clade_Ia
CAPIT290_D1-1	2018	human	nasopharynx	ST180	3	ERR10112780		12	clade_Ia
CAPIT301_D1-1	2018	human	nasopharynx	ST180	3	ERR10112793		12	clade_Ia
CAPIT311_D1-1	2017	human	nasopharynx	ST180	3	ERR10112804		12	clade_Ia
CAPIT324_D1-1	2018	human	nasopharynx	ST180	3	ERR10112820		12	clade_Ia
UoS3286	2009	human	nasopharynx	ST199	19A	ERR046130	carriage	4
UoS3287	2009	human	nasopharynx	ST199	19A	ERR046131	carriage	4
UoS4138	2009	human	nasopharynx	ST199	19A	ERR046178	carriage	4
UoS4044	2009	human	nasopharynx	ST199	19A	ERR046156	carriage	4
UoS0280	2007	human	nasopharynx	ST199	19A	ERR044934	carriage	4
UoS5050	2010	human	nasopharynx	ST199	19A	ERR045415	carriage	4
UoS4279	2010	human	nasopharynx	ST199	19A	ERR045352	carriage	4
UoS0281	2007	human	nasopharynx	ST199	19A	ERR044935	carriage	4
UoS0207	2007	human	nasopharynx	ST199	19A	ERR044907	carriage	4
UoS2373	2008	human	nasopharynx	ST199	19A	ERR048222	carriage	4
UoS4104	2009	human	nasopharynx	ST199	19A	ERR046172	carriage	4
UoS4386	2010	human	nasopharynx	ST199	19A	ERR045390	carriage	4
UoS3210	2009	human	nasopharynx	ST199	19A	ERR046103	carriage	4
UoS4269	2010	human	nasopharynx	ST199	19A	ERR046208	carriage	4
UoS4285	2010	human	nasopharynx	ST199	19A	ERR045353	carriage	4
UoS2168	2008	human	nasopharynx	ST199	19A	ERR045005	carriage	4
UoS4273	2010	human	nasopharynx	ST199	19A	ERR045350	carriage	4
UoS4322	2010	human	nasopharynx	ST199	19A	ERR045365	carriage	4
UoS3020	2008	human	nasopharynx	ST199	19A	ERR048229	carriage	4
UoS3048	2008	human	nasopharynx	ST199	19A	ERR046058	carriage	4
UoS3153	2009	human	nasopharynx	ST199	19A	ERR046084	carriage	4
UoS3227	2009	human	nasopharynx	ST199	19A	ERR046107	carriage	4
UoS5053	2010	human	nasopharynx	ST199	19A	ERR047126	carriage	4
UOS_6237	2012	human	nasopharynx	ST199	19A	ERR657324	carriage	4
PHESPV0030	2010	human		ST199	19A	ERR1438820		4
PHESPV0031	2010	human		ST199	19A	ERR1438821		4
PHESPV0032	2010	human		ST199	19A	ERR1438822		4
PHESPV0036	2010	human		ST199	19A	ERR1438826		4
PHESPV0037	2010	human		ST199	19A	ERR1438827		4
PHESPV0038	2010	human		ST199	19A	ERR1438828		4
PHESPV0039	2010	human		ST199	19A	ERR1438829		4
PHESPV0040	2010	human		ST199	19A	ERR1438830		4
PHESPV0041	2010	human		ST199	19A	ERR1438831		4
PHESPV0042	2010	human		ST199	19A	ERR1438832		4
PHESPV0044	2010	human		ST199	19A	ERR1438834		4
PHESPV0050	2010	human		ST199	19A	ERR1438840		4
PHESPV0052	2010	human		ST199	19A	ERR1438842		4
PHESPV0056	2010	human		ST199	19A	ERR1438846		4
PHESPV0065	2010	human		ST199	19A	ERR1438855		4
PHESPV0073	2010	human		ST199	19A	ERR1438863		4
PHESPV0096	2010	human		ST199	19A	ERR1438886		4
PHESPV0113	2010	human		ST199	19A	ERR1438903		4
PHESPV0136	2010	human		ST199	19A	ERR1438926		4
PHESPV0147	2010	human		ST199	19A	ERR1438937		4
PHESPV0153	2010	human		ST199	19A	ERR1438943		4
PHESPV0155	2010	human		ST199	19A	ERR1438945		4
PHESPV0157	2010	human		ST199	19A	ERR1438947		4
PHESPV0160	2010	human		ST199	19A	ERR1438950		4
PHESPV0163	2010	human		ST199	19A	ERR1438953		4
PHESPV0164	2010	human		ST199	19A	ERR1438954		4
PHESPV0165	2010	human		ST199	19A	ERR1438955		4
PHESPV0168	2010	human		ST199	19A	ERR1438958		4
PHESPV0169	2010	human		ST199	19A	ERR1438959		4
PHESPV0177	2010	human		ST199	19A	ERR1438967		4
PHESPV0178	2010	human		ST199	19A	ERR1438968		4
PHESPV0182	2010	human		ST199	19A	ERR1438972		4
PHESPV0184	2010	human		ST199	19A	ERR1438974		4
PHESPV0187	2010	human		ST199	19A	ERR1438977		4
PHESPV0191	2010	human		ST199	19A	ERR1438980		4
PHESPV0192	2010	human		ST199	19A	ERR1438981		4
PHESPV0193	2010	human		ST199	19A	ERR1438982		4
PHESPV0241	2013	human		ST199	19A	ERR1439030		4
PHESPV0254	2013	human		ST199	19A	ERR1439043		4
PHESPV0287	2013	human		ST199	19A	ERR1439076		4
PHESPV0300	2013	human		ST199	19A	ERR1439089		4
PHESPV0319	2013	human		ST199	19A	ERR1439108		4
PHESPV0325	2013	human		ST199	19A	ERR1439114		4
PHESPV0326	2013	human		ST199	19A	ERR1439115		4
PHESPV0330	2014	human		ST199	19A	ERR1439119		4
PHESPV0364	2014	human		ST199	19A	ERR1439153		4
PHESPV0367	2014	human		ST199	19A	ERR1439156		4
PHESPV0372	2014	human		ST199	19A	ERR1439161		4
PHESPV0375	2014	human		ST199	19A	ERR1439164		4
PHESPV0376	2014	human		ST199	19A	ERR1439165		4
PHESPV0377	2014	human		ST199	19A	ERR1439166		4
PHESPV0387	2014	human		ST199	19A	ERR1439176		4
PHESPV0389	2014	human		ST199	19A	ERR1439178		4
PHESPV0405	2014	human		ST199	19A	ERR1439194		4
PHESPV0409	2014	human		ST199	19A	ERR1439198		4
PHESPV0420	2014	human		ST199	19A	ERR1439209		4
PHESPV0445	2014	human		ST199	19A	ERR1439234		4
PHESPV0636	2014	human		ST199	19A	ERR1439425		4
PHESPV0729	2014	human		ST199	19A	ERR1439518		4
PHESPV0811	2014	human		ST199	19A	ERR1439600		4
PHESPV0828	2014	human		ST199	19A	ERR1439617		4
PHESPV0863	2014	human		ST199	19A	ERR1439652		4
PHESPV0864	2014	human		ST199	19A	ERR1439653		4
PHESPV0883	2015	human		ST199	19A	ERR1439672		4
PHESPV0886	2015	human		ST199	19A	ERR1439675		4
PHESPV0889	2015	human		ST199	19A	ERR1439678		4
PHESPV0892	2015	human		ST199	19A	ERR1439681		4
PHESPV0904	2015	human		ST199	19A	ERR1439693		4
PHESPV0934	2015	human		ST199	19A	ERR1439723		4
PHESPV0939	2015	human		ST199	19A	ERR1439728		4
PHESPV0940	2015	human		ST199	19A	ERR1439729		4
PHESPV0945	2015	human		ST199	19A	ERR1439734		4
PHESPV0948	2015	human		ST199	19A	ERR1439737		4
PHESPV0970	2015	human		ST199	19A	ERR1439759		4
PHESPV0986	2015	human		ST199	19A	ERR1439775		4
PHESPV0995	2015	human		ST199	19A	ERR1439784		4
PHESPV1055	2015	human		ST199	19A	ERR1439844		4
PHESPV1099	2015	human		ST199	19A	ERR1439888		4
PHESPV1100	2015	human		ST199	19A	ERR1439889		4
PHESPV1106	2015	human		ST199	19A	ERR1439895		4
PHESPV1182	2015	human		ST199	19A	ERR1439971		4
PHESPV1195	2015	human		ST199	19A	ERR1439984		4
PHESPV1217	2015	human		ST199	19A	ERR1440006		4
PHESPV1225	2015	human		ST199	19A	ERR1440014		4
PHESPV1282	2015	human		ST199	19A	ERR1440071		4
PHESPV1293	2015	human		ST199	19A	ERR1440082		4
PHESPV1317	2015	human		ST199	19A	ERR1440106		4
PHESPV1388	2015	human		ST199	19A	ERR1440175		4
PHESPV2018	2003	human		ST199	19A	ERR1440803		4
PHESPD0147	2004	human		ST199	19A	ERR1438066		4
PHESPD0494	2013	human		ST199	19A	ERR1438413		4
PHESPD0593	2013	human		ST199	19A	ERR1438512		4
PHESPD0650	2013	human		ST199	19A	ERR1438569		4
PHESPD0699	2013	human		ST199	19A	ERR1438618		4
PHESPD0700	2013	human		ST199	19A	ERR1438619		4
PHESPD0713	2013	human		ST199	19A	ERR1438632		4
PHESPD0718	2013	human		ST199	19A	ERR1438637		4
PHESPD0726	2013	human		ST199	19A	ERR1438645		4
PHESPD0727	2013	human		ST199	19A	ERR1438646		4
PHESPD0733	2013	human		ST199	19A	ERR1438652		4
759539	2002	human		ST199	15B/C	ERR3530452		4
759538	2002	human		ST199	15B/C	ERR3530948		4
759537	2002	human		ST199	15B/C	ERR3530907		4
757969	2002	human		ST199	15B/C	ERR3530988		4
757968	2002	human		ST199	15B/C	ERR3530768		4
757939	2002	human		ST199	15B/C	ERR3530305		4
756658	2002	human		ST199	15B/C	ERR3530616		4
756654	2002	human		ST199	15B/C	ERR3530904		4
756642	2002	human		ST199	15B/C	ERR3531043		4
753444	2002	human		ST199	15B/C	ERR3530745		4
720973	2009	human		ST199	15B/C	ERR3530638		4
720952	2009	human		ST199	15B/C	ERR3531032		4
720951	2009	human		ST199	15B/C	ERR3530562		4
720194	2009	human		ST199	15B/C	ERR3530310		4
720183	2009	human		ST199	15B/C	ERR3530276		4
717968	2013	human		ST199	15B/C	ERR3530610		4
717950	2013	human		ST199	15B/C	ERR3530736		4
717946	2013	human		ST199	15B/C	ERR3531004		4
653572	2018	human		ST199	15B/C	ERR3530882		4
308639	2016	human		ST199	15B/C	ERR3530666		4
308631	2016	human		ST199	15B/C	ERR3531007		4
308624	2016	human		ST199	15B/C	ERR3530480		4
308581	2016	human		ST199	15B/C	ERR3531079		4
308567	2016	human		ST199	15B/C	ERR3530361		4
759525	2002	human		ST199	19A	ERR3530356		4
759524	2002	human		ST199	19A	ERR3530931		4
756646	2002	human		ST199	19A	ERR3530774		4
756643	2002	human		ST199	19A	ERR3530468		4
755703	2002	human		ST199	19A	ERR3530516		4
753473	2002	human		ST199	19A	ERR3531054		4
720974	2009	human		ST199	19A	ERR3530307		4
720950	2009	human		ST199	19A	ERR3530925		4
720230	2009	human		ST199	19A	ERR3530709		4
720225	2009	human		ST199	19A	ERR3530943		4
720224	2009	human		ST199	19A	ERR3531072		4
720187	2009	human		ST199	19A	ERR3531006		4
308626	2016	human		ST199	19A	ERR3530937		4
308560	2016	human		ST199	19A	ERR3530681		4
CAPIT012_D1-1	2017	human	nasopharynx	ST199	15B/C	ERR10112454		4
CAPIT035_D1-1	2017	human	nasopharynx	ST199	19A	ERR10112481		4
CAPIT075_D1-1	2019	human	nasopharynx	ST199	15B/C	ERR10112529		4
CAPIT148_D1-1	2018	human	nasopharynx	ST199	15B/C	ERR10112614		4
CAPIT176_D1-1	2017	human	nasopharynx	ST199	15B/C	ERR10112647		4
CAPIT182_D29-1	2018	human	nasopharynx	ST199	15B/C	ERR10112653		4
CAPIT202_D29-1	2018	human	nasopharynx	ST199	19A	ERR10112677		4
CAPIT212_D29-1	2018	human	nasopharynx	ST199	15B/C	ERR10112689		4
CAPIT224_D29-1	2018	human	nasopharynx	ST199	19A	ERR10112704		4
CAPIT226_D1-1	2018	human	nasopharynx	ST199	19A	ERR10112706		4
CAPIT236_D1-1	2017	human	nasopharynx	ST199	15B/C	ERR10112717		4
CAPIT242_D1-1	2018	human	nasopharynx	ST199	15B/C	ERR10112726		4
PHESPV0058	2010	human		ST2062	19A	ERR1438848		17
PHESPV0369	2014	human		ST2062	19A	ERR1439158		17
PHESPV0403	2014	human		ST2062	19A	ERR1439192		17
PHESPV0406	2014	human		ST2062	19A	ERR1439195		17
PHESPV0417	2014	human		ST2062	19A	ERR1439206		17
PHESPV0899	2015	human		ST2062	19A	ERR1439688		17
720214	2009	human		ST2062	19A	ERR3531113		17
CAPIT289_D1-1	2018	human	nasopharynx	ST2062	19A	ERR10112779		17
CAPIT058_D1-1	2018	human	nasopharynx	ST3423	19F	ERR10112509		119
758012	2002	human		ST420	19F	ERR3530812		1
757998	2002	human		ST420	19F	ERR3530653		1
756680	2002	human		ST420	19F	ERR3530773		1
720189	2009	human		ST420	19F	ERR3531071		1
758020	2002	human		ST422	19F	ERR3530714		316
756673	2002	human		ST422	19F	ERR3530796		316
756639	2002	human		ST422	19F	ERR3530519		316
756635	2002	human		ST422	19F	ERR3530491		316
PHESPV0173	2010	human		ST450	19A	ERR1438963		4
PHESPV0180	2010	human		ST450	19A	ERR1438970		4
PHESPV0185	2010	human		ST450	19A	ERR1438975		4
PHESPV0695	2014	human		ST450	19A	ERR1439484		4
PHESPV0756	2014	human		ST450	19A	ERR1439545		4
PHESPV0879	2015	human		ST450	19A	ERR1439668		4
PHESPV0931	2015	human		ST450	19A	ERR1439720		4
PHESPV0964	2015	human		ST450	19A	ERR1439753		4
PHESPV0980	2015	human		ST450	19A	ERR1439769		4
753438	2002	human		ST450	19A	ERR3530399		4
720977	2009	human		ST450	19A	ERR3531093		4
720206	2009	human		ST450	19A	ERR3530455		4
CAPIT234_D1-1	2019	human	nasopharynx	ST450	19A	ERR10112714		4
PHESPD0611	2013	human		ST654	19F	ERR1438530		119
CAPIT230_D29-1	2019	human	nasopharynx	ST654	19F	ERR10112710		119
PHESPV0131	2010	human		ST667	19A	ERR1438921		4
PHESPV0374	2014	human		ST667	19A	ERR1439163		4
PHESPV0878	2015	human		ST667	19A	ERR1439667		4
PHESPV0920	2015	human		ST667	19A	ERR1439709		4
PHESPV1175	2015	human		ST667	19A	ERR1439964		4
PHESPD0675	2013	human		ST667	19A	ERR1438594		4
CAPIT127_D29-1	2018	human	nasopharynx	ST667	19A	ERR10112593		4
CAPIT305_D1-1	2018	human	nasopharynx	ST7024	19F	ERR10112797		44
CAPIT104_D1-1	2018	human	nasopharynx	ST9972	19F	ERR10112564		44
